# Supplementary material
Source: Research Square preprint supplement (doi:10.21203/rs.3.rs-9777862/v1)
Supplement: Supplementary file 1 [file 8a0fe8b261662ad80a70a7dd.docx]

**SUPPLEMENTARY INFORMATION**

**Evaluating the host potential of 9,9’-bifluorenyl-9,9’-diol for anisole and the three methylanisole isomers, and its behaviour in mixed guest solutions**

**Benita Barton,* Jaime-lee Groenewaldt,* and Eric C. Hosten**

*Department of Chemistry, Nelson Mandela University, PO Box 77000, Port Elizabeth, 6031, South Africa. Email:* [*benita.barton@mandela.ac.za*](mailto:benita.barton@mandela.ac.za); [*s224525069@mandela.ac.za*](mailto:s224525069@mandela.ac.za)


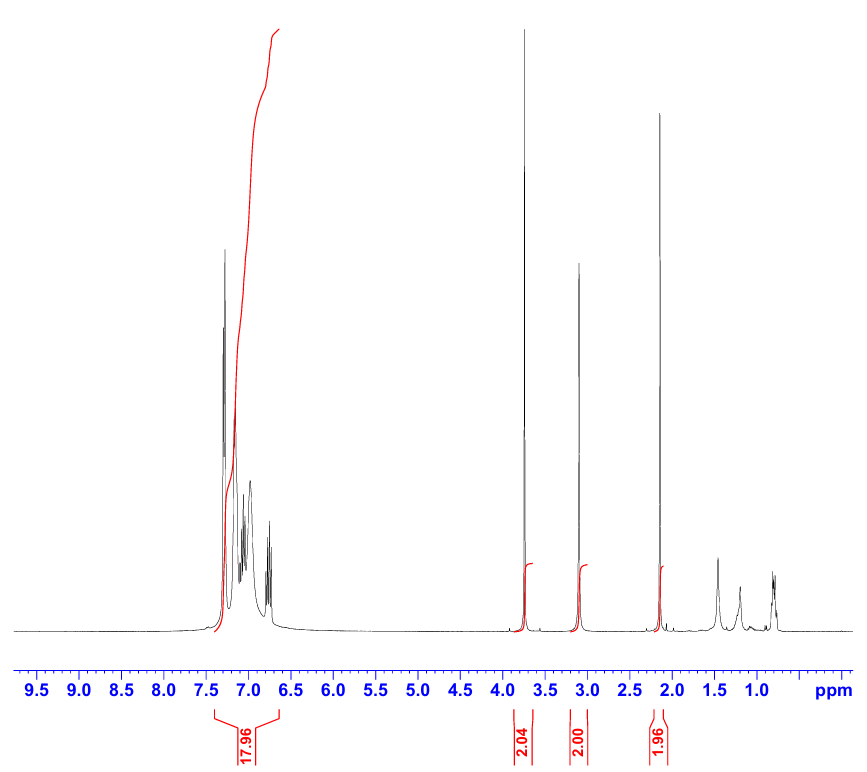

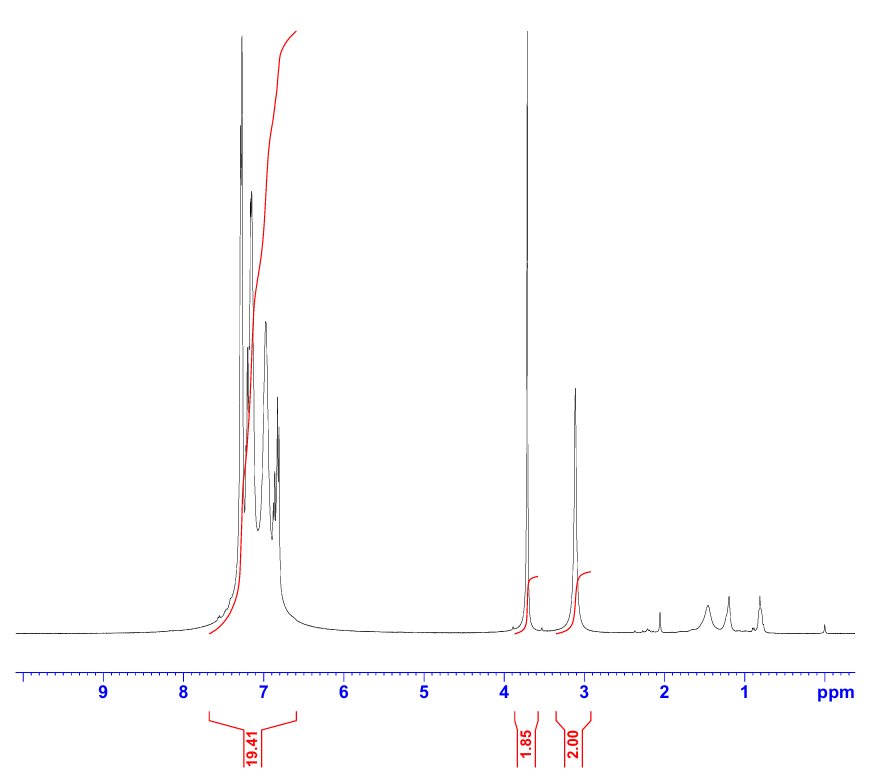
(a) (b)


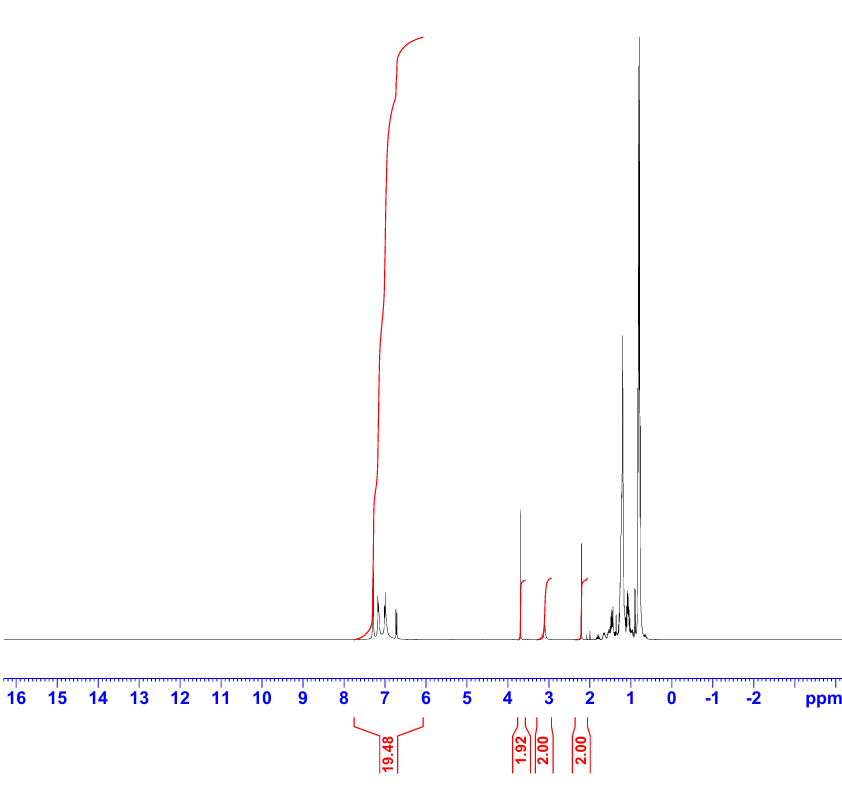

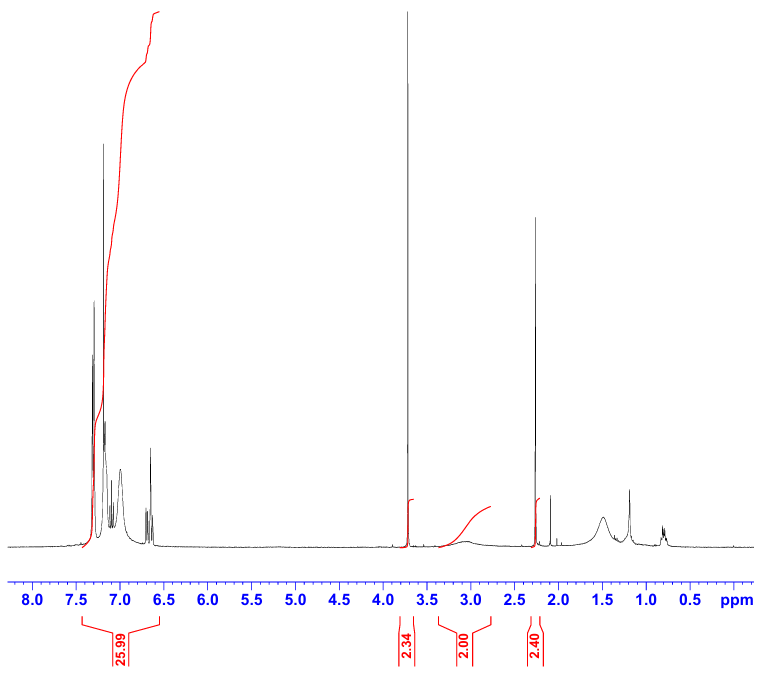
(c) (d)


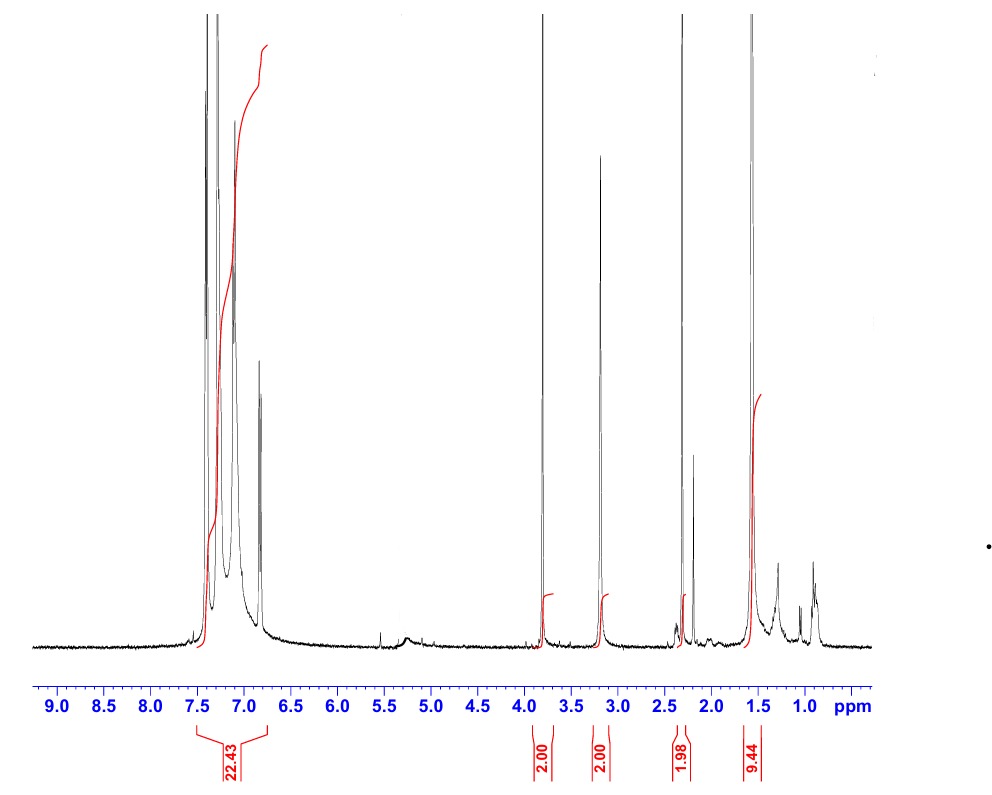
(e)

**Figure S1** 1H-NMR spectra of (a) 2(**H**)·ANI, (b) **H**·2MA, (c) **H**·3MA, (d) 3(**H**)·2(4MA1), and (e) **H**·4MA2 from single-solvent host crystallization experiments.


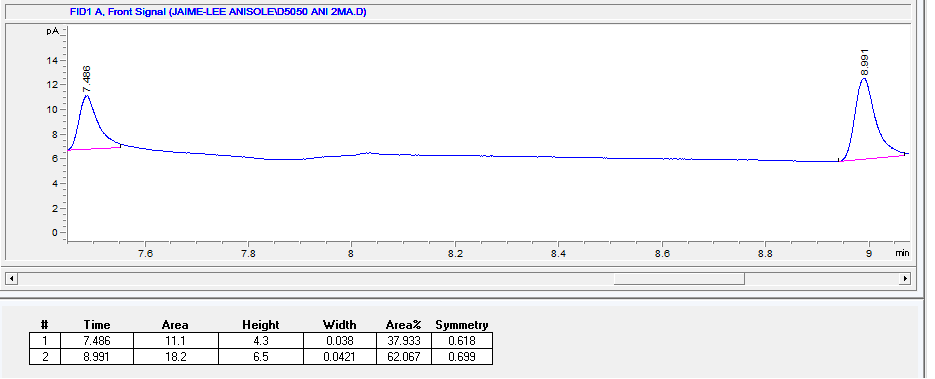

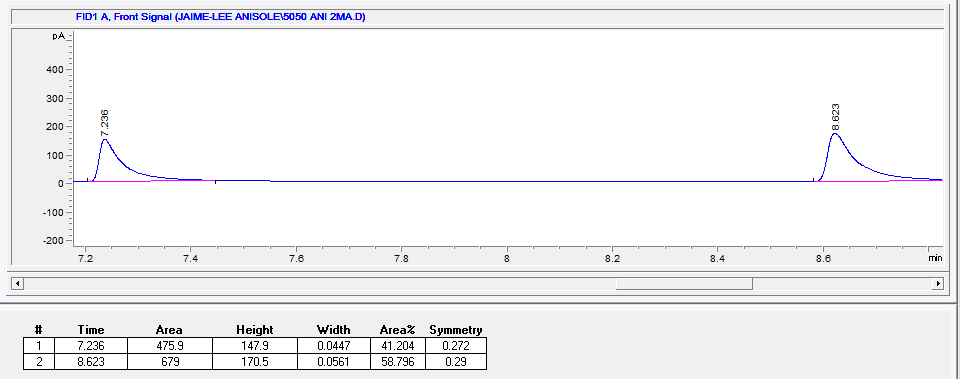
(a) (b)


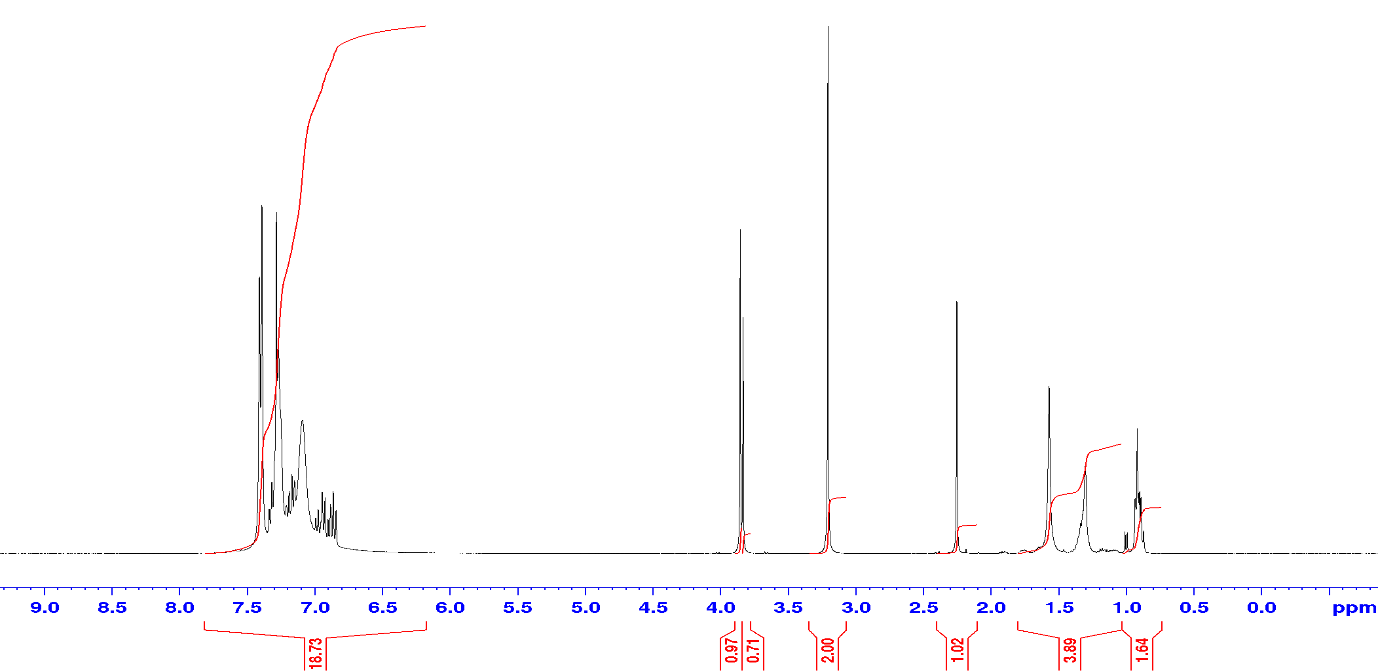


(c)

**Figure S2** Relevant data for **H** equimolar guest competition of ANI:2MA (a) GC trace, (b) GC trace of its duplicate, and (c) 1H-NMR spectra.


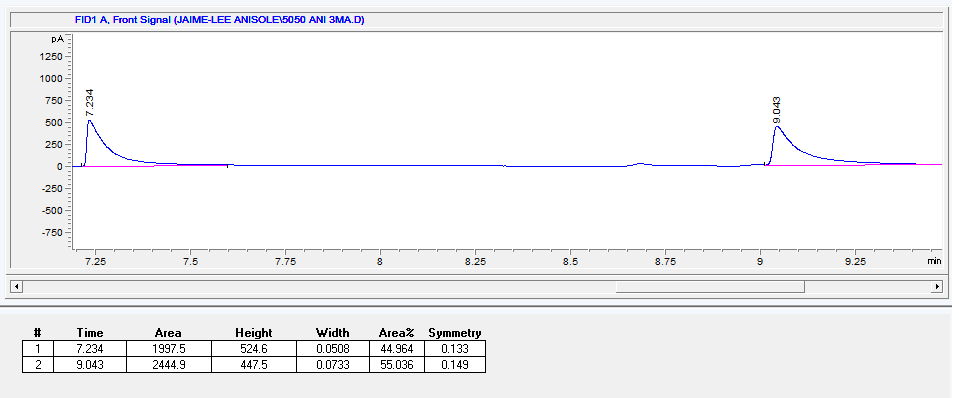

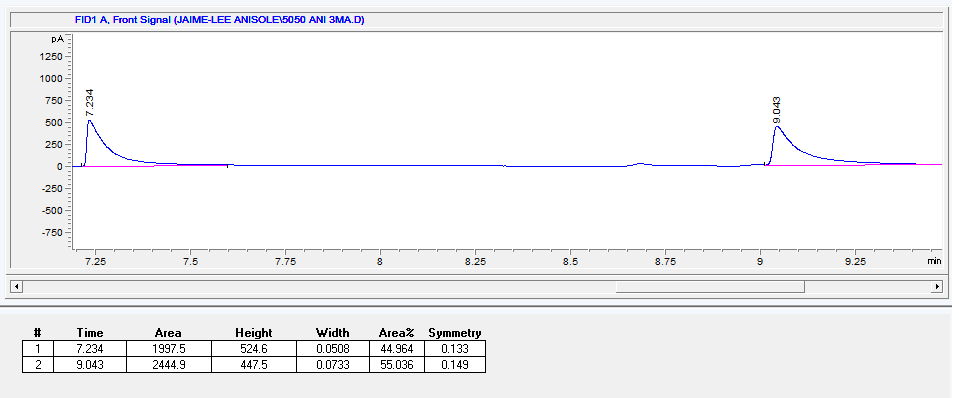
(a) (b)


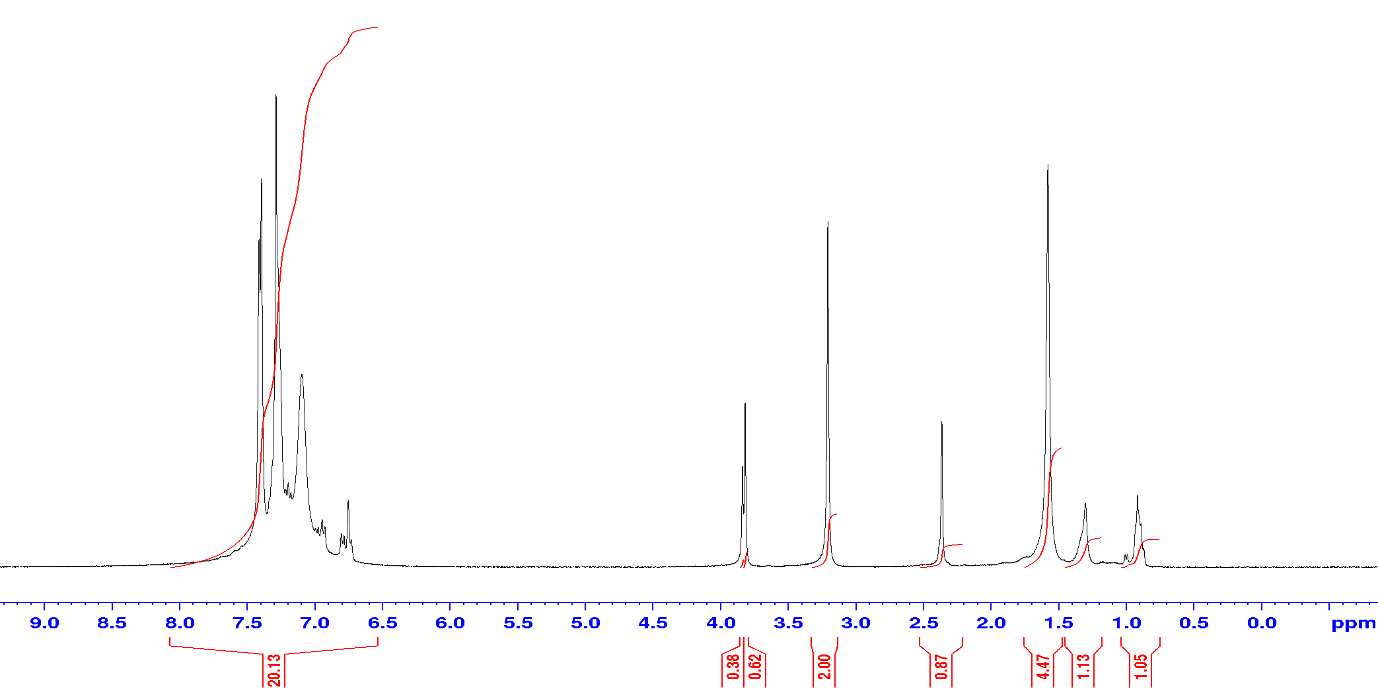
(c)

**Figure S3** Relevant data for **H** equimolar guest competition of ANI:3MA (a) GC trace, (b) GC trace of its duplicate, and (c) 1H-NMR spectra.


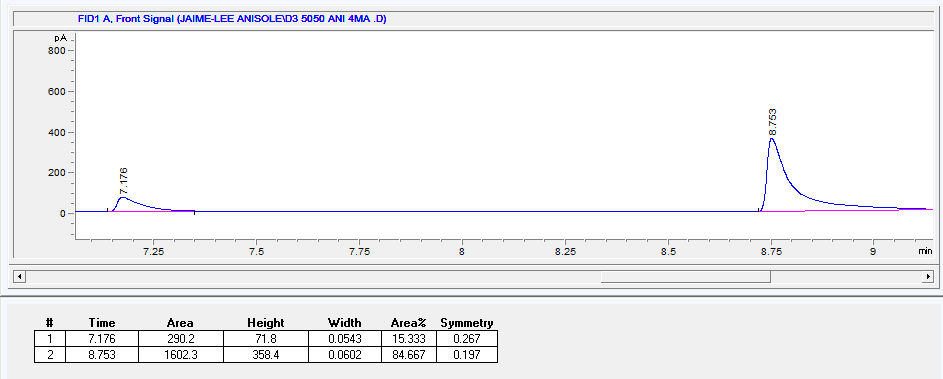

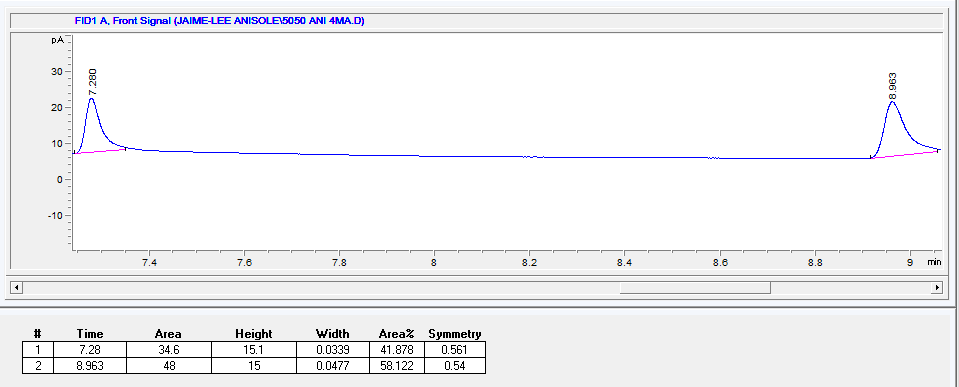
(a) (b)


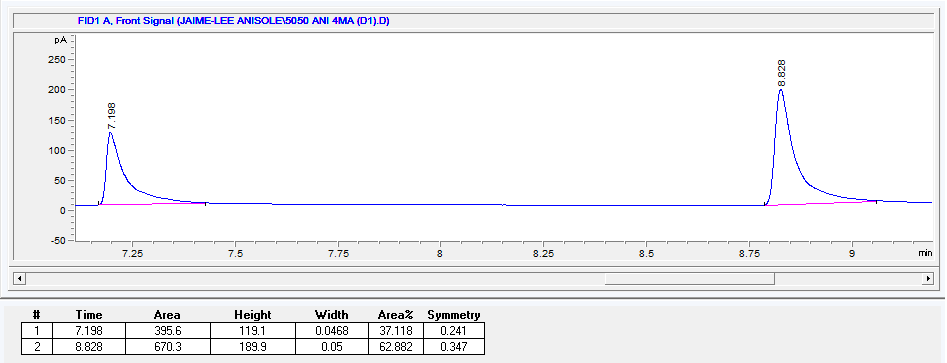
*
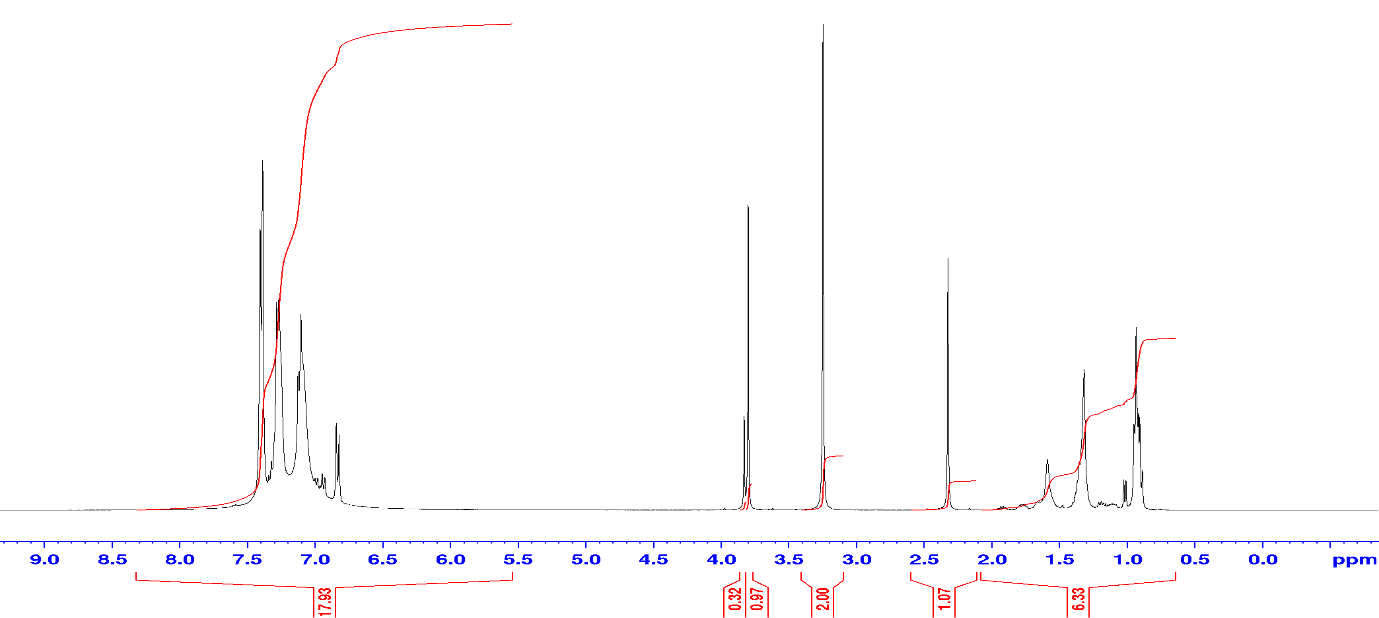
*(c) (d)

**Figure S4** Relevant data for **H** equimolar guest competition of ANI:4MA (a) GC trace, (b) GC trace of its duplicate, (c) GC trace of its triplicate, and (d) 1H-NMR spectra.


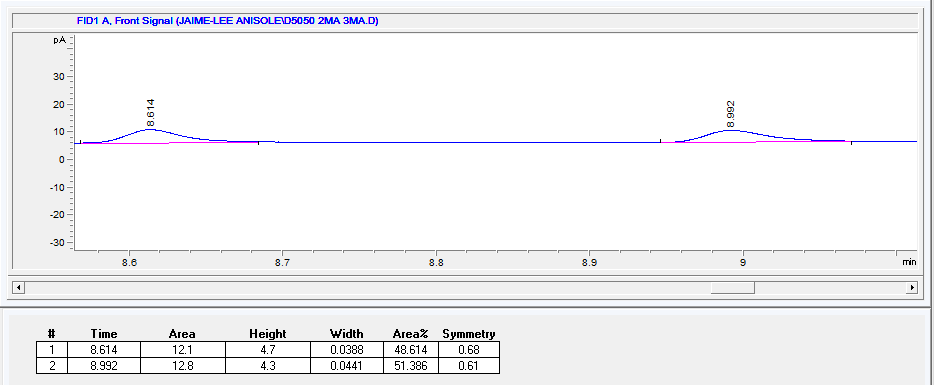

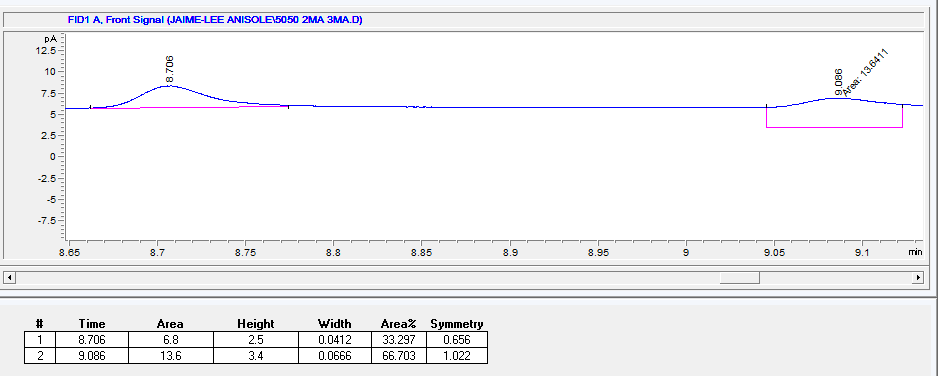
(a) (b)

***
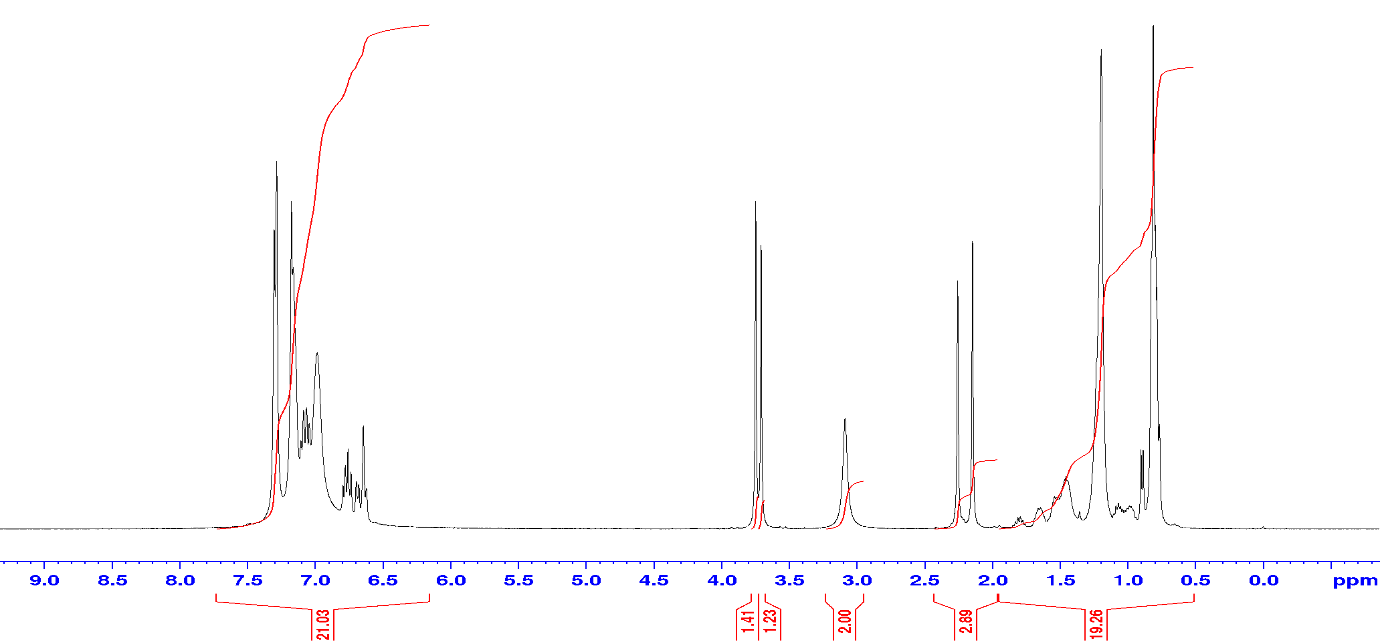
***(c)

**Figure S5** Relevant data for **H** equimolar guest competition of 2MA:3MA (a) GC trace, (b) GC trace of its duplicate, and (c) 1H-NMR spectra.


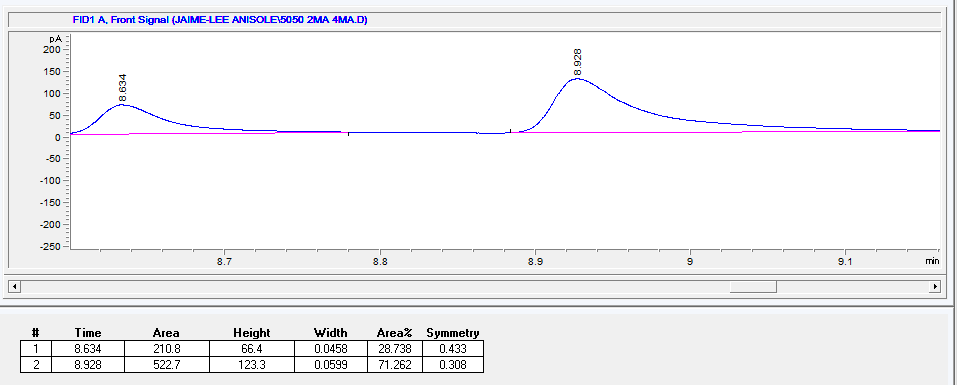

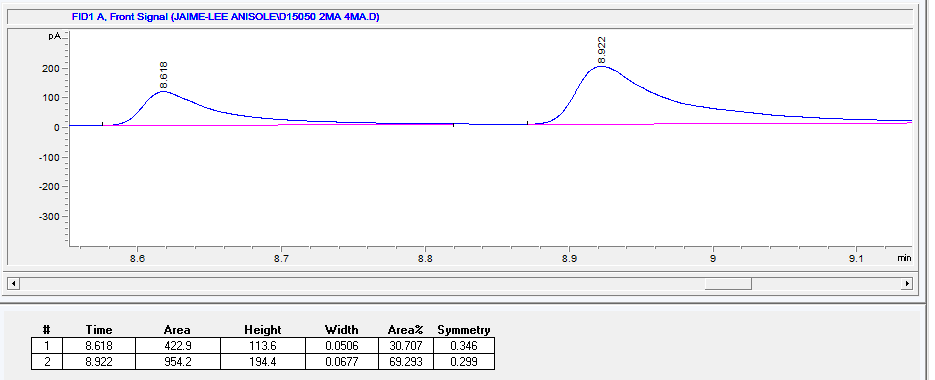
(a) (b)

***
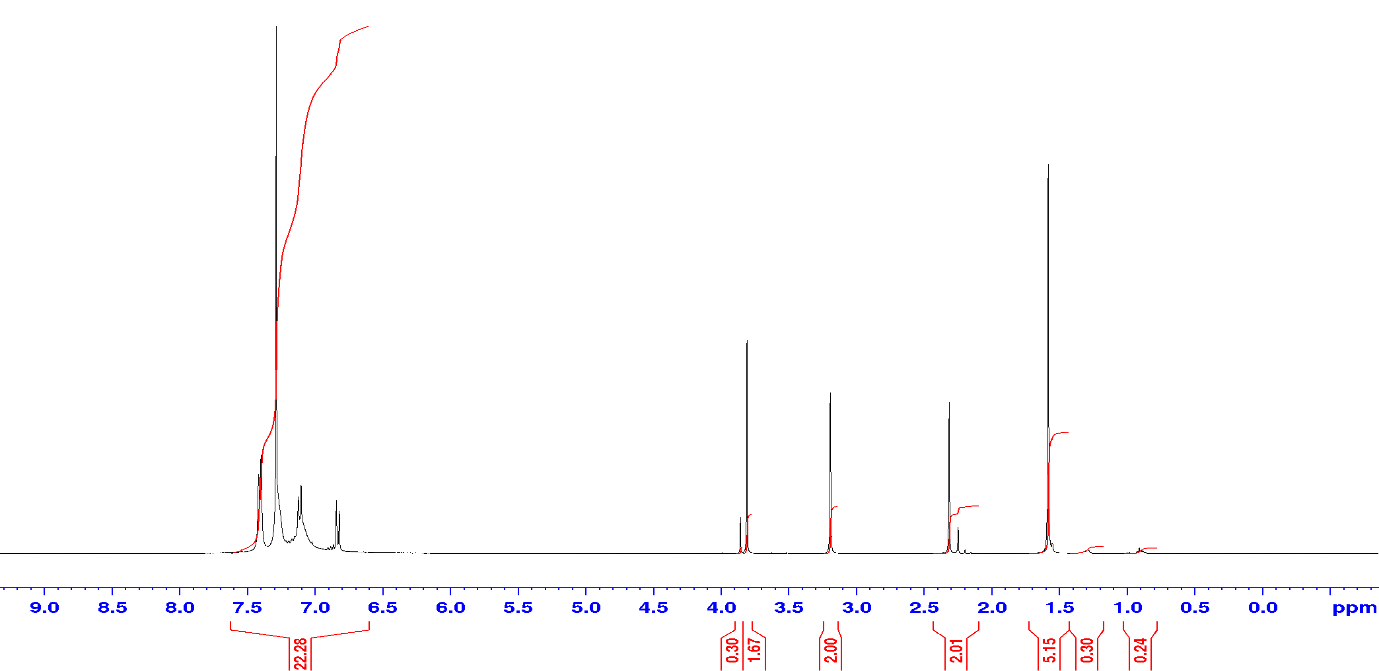
***(c)

**Figure S6** Relevant data for **H** equimolar guest competition of 2MA:4MA (a) GC trace, (b) GC trace of its duplicate, and (c) 1H-NMR spectra.

1.
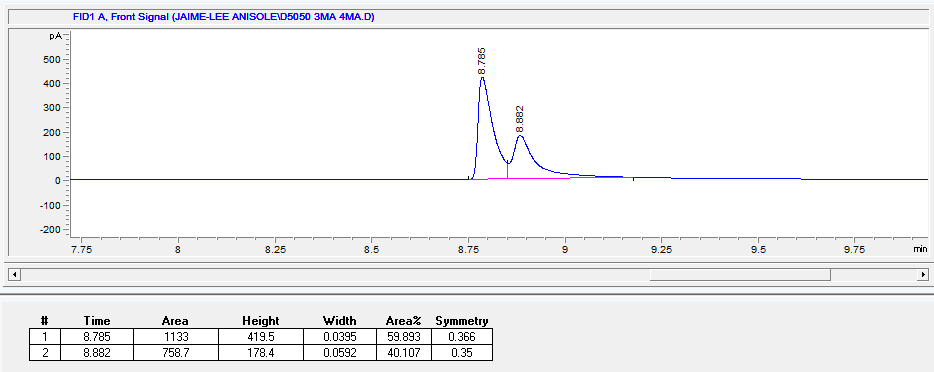

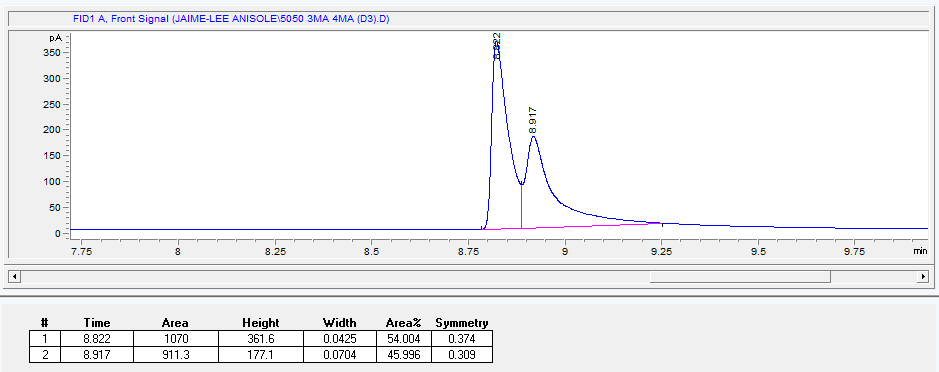
 (b)

***
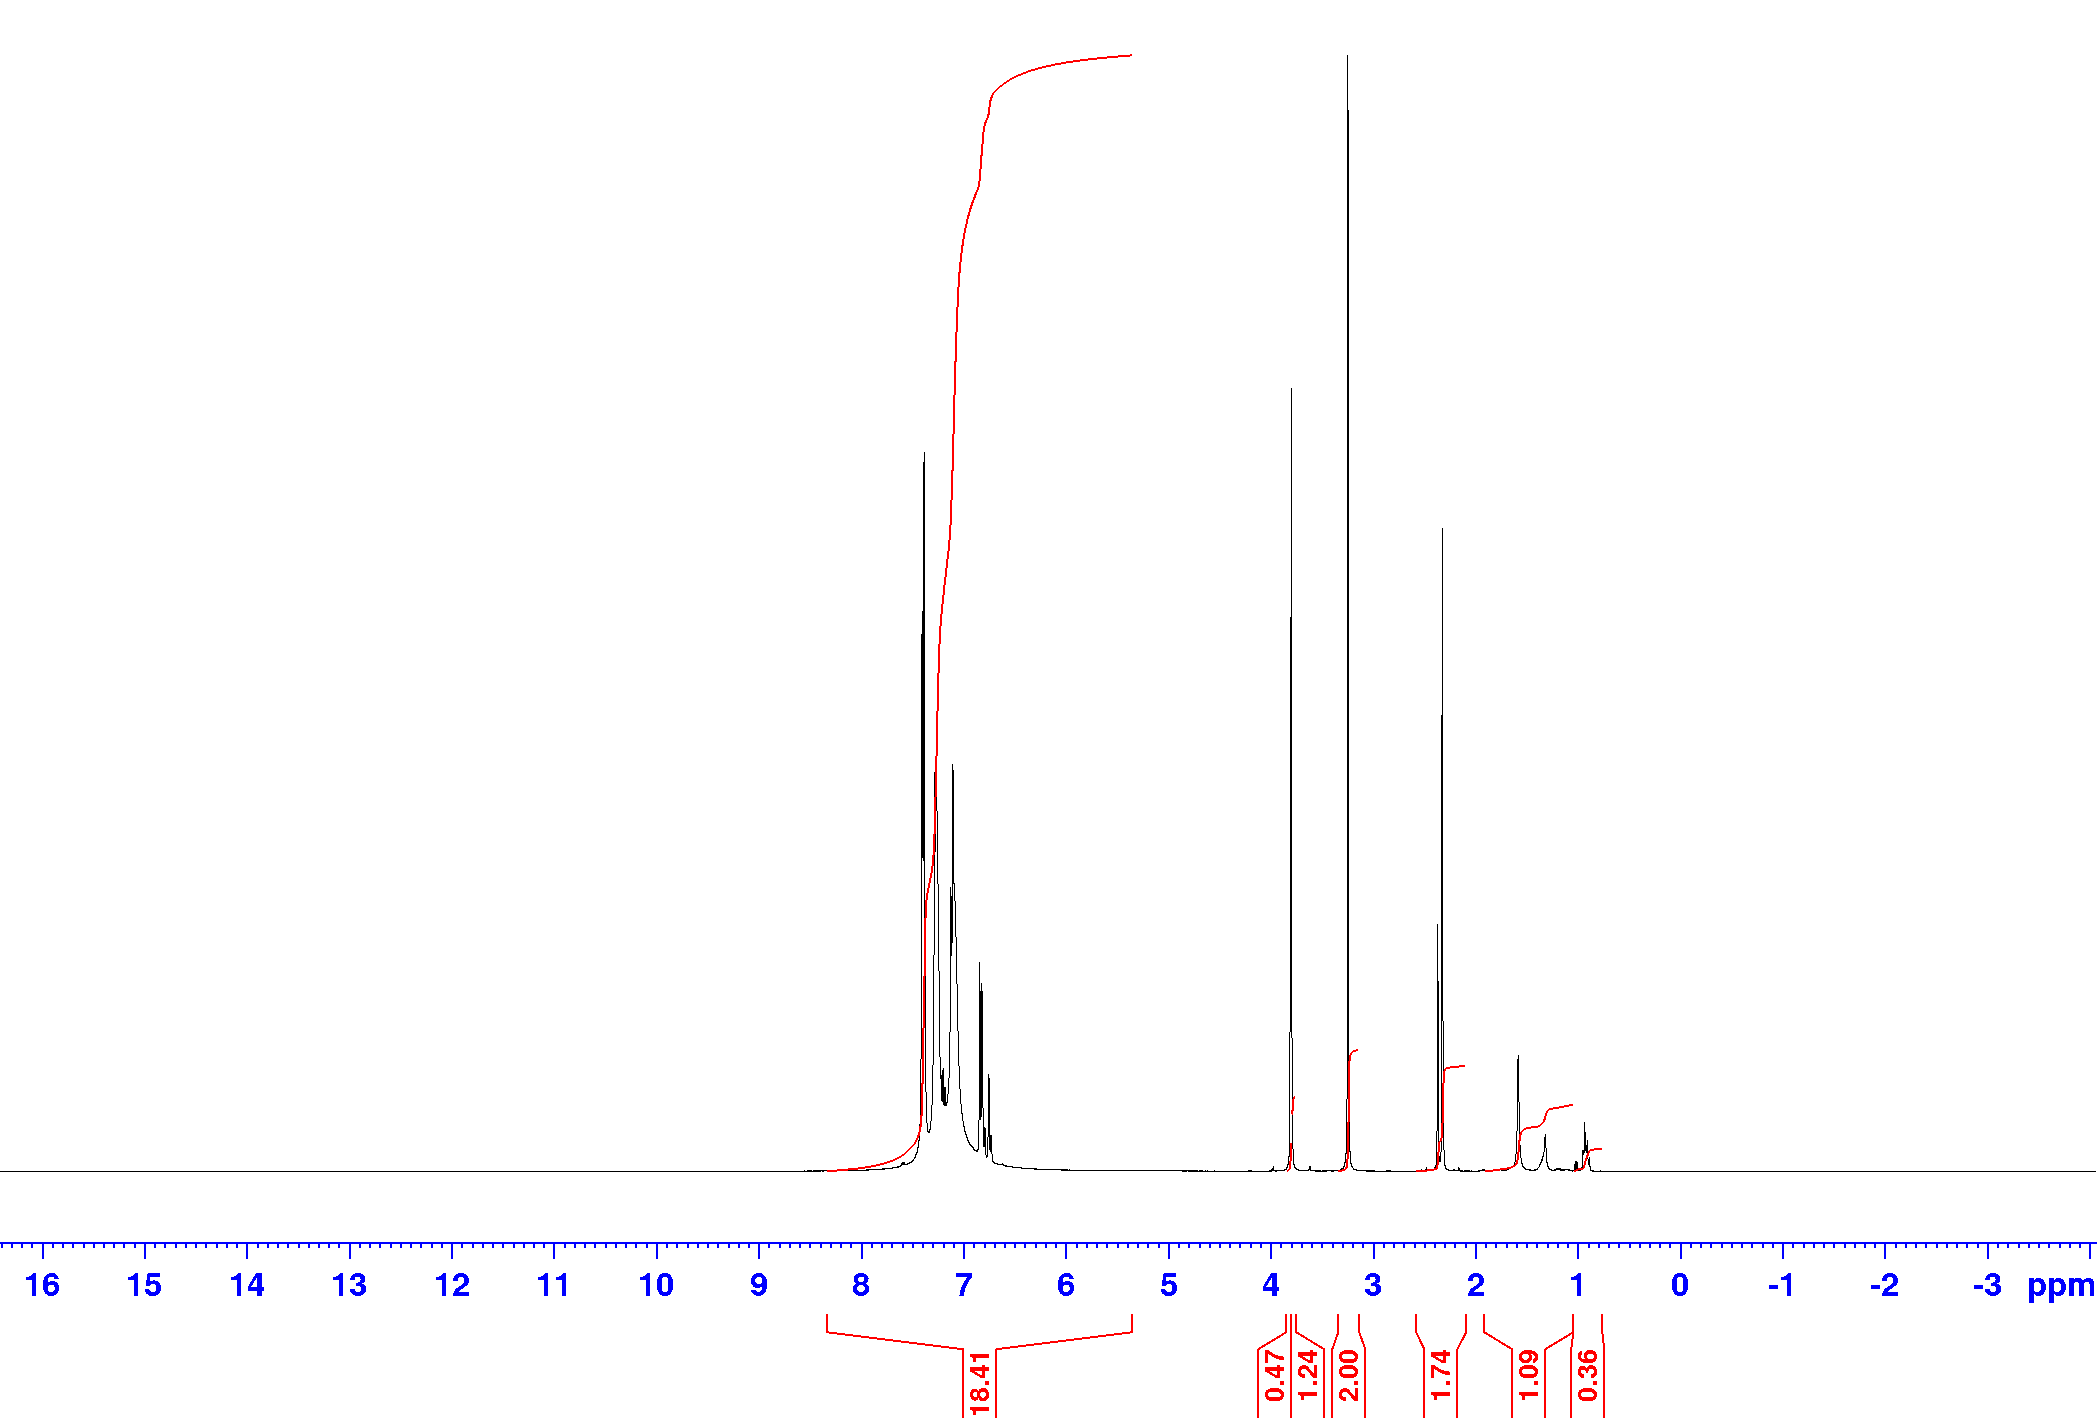
***(c)

**Figure S7** Relevant data for **H** equimolar guest competition of 3MA:4MA (a) GC trace, (b) GC trace of its duplicate, and (c) 1H-NMR spectra.

1.
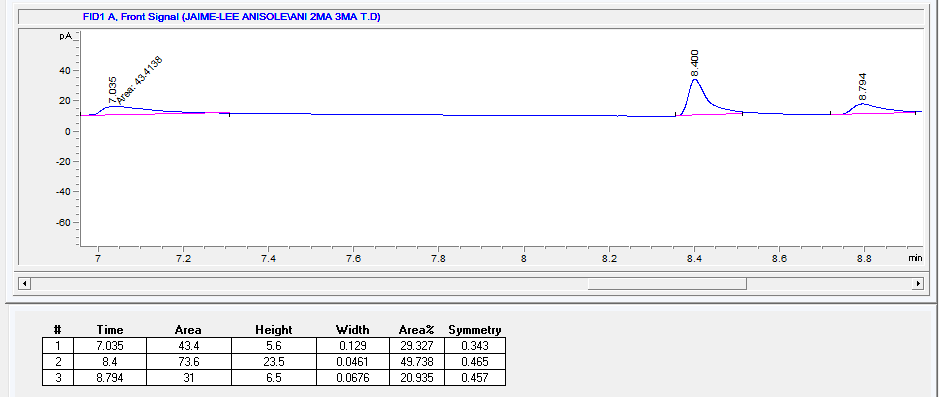

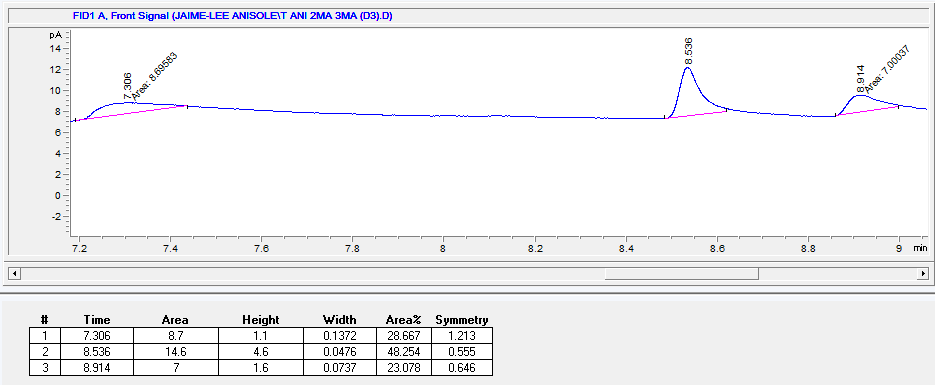
 (b)

***
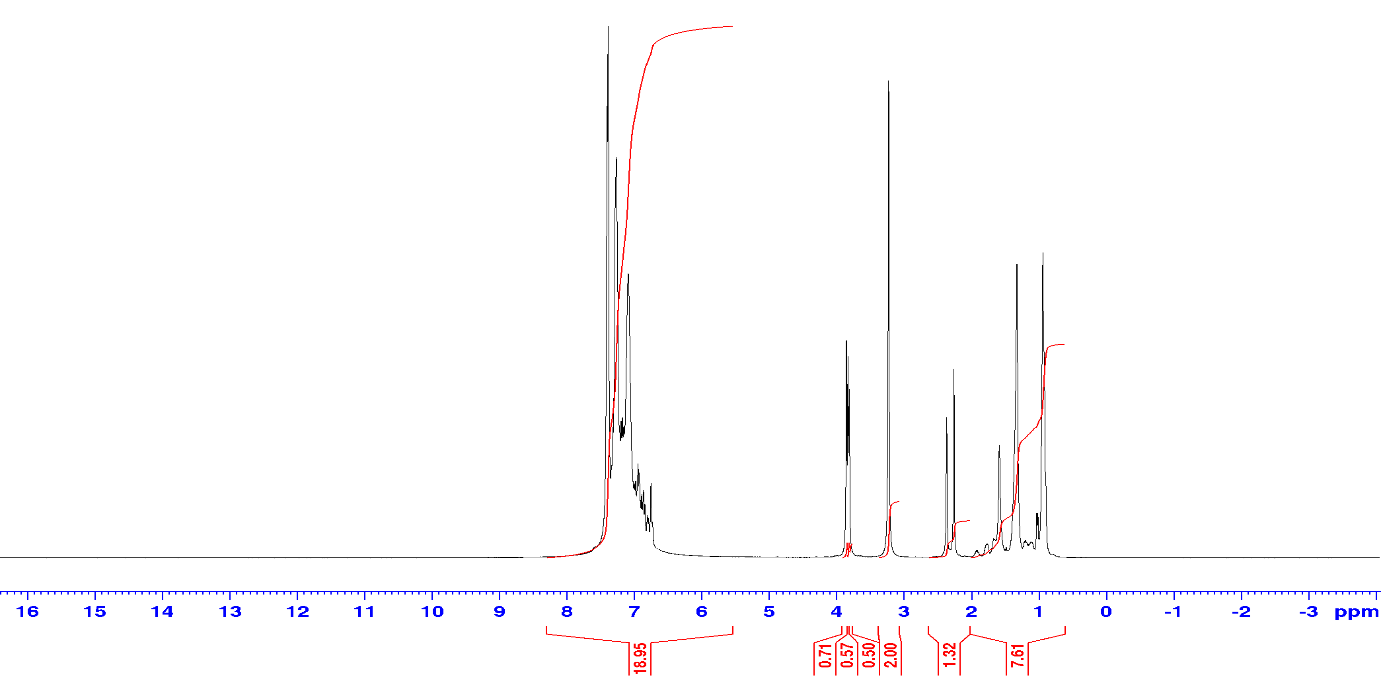
***(c)

**Figure S8** Relevant data for **H** equimolar guest competition of ANI:2MA:3MA (a) GC trace, (b) GC trace of its duplicate, and (c) 1H-NMR spectra.

1.
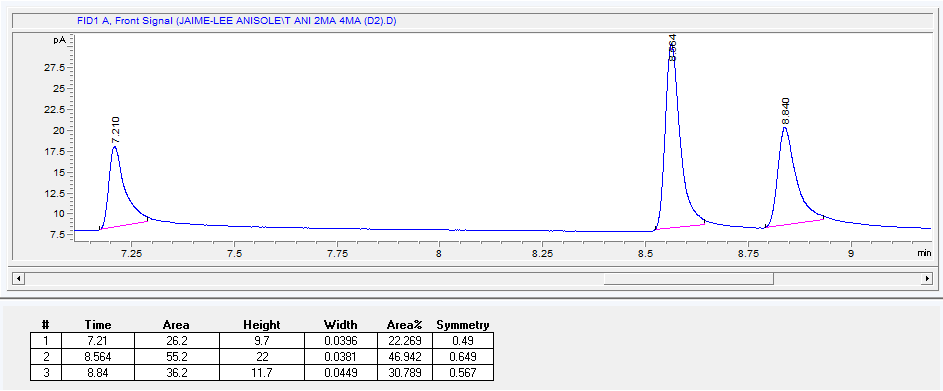

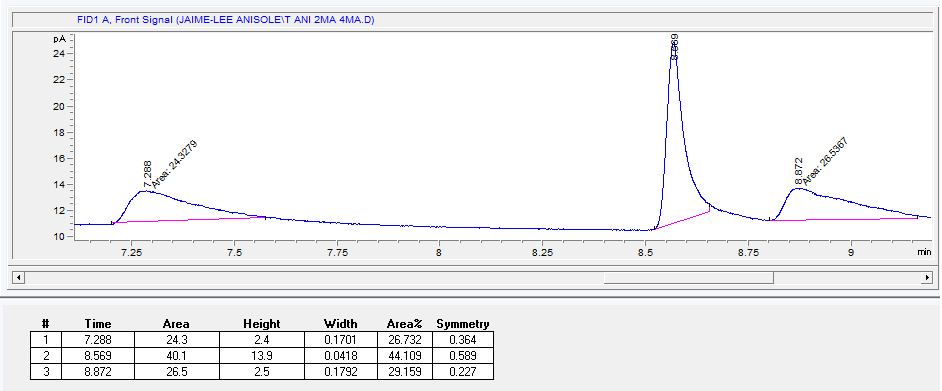
 (b)

***
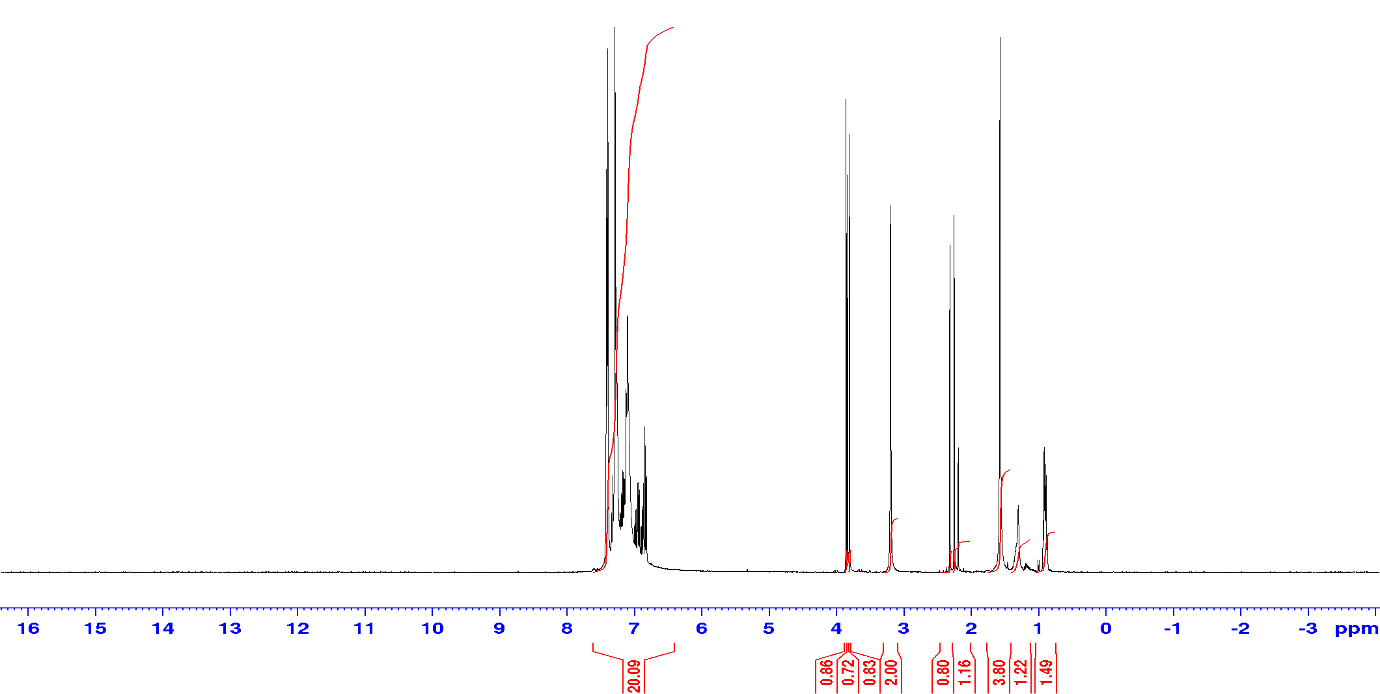
***(c)

**Figure S9** Relevant data for **H** equimolar guest competition of ANI:2MA:4MA (a) GC trace, (b) GC trace of its duplicate, and (c) 1H-NMR spectra.


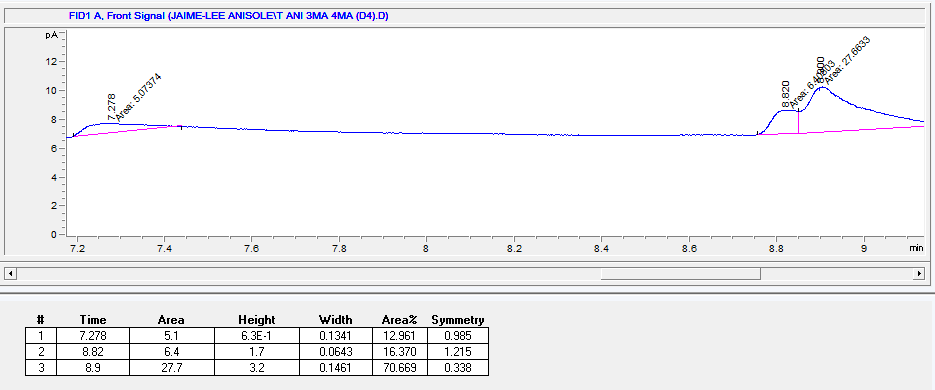

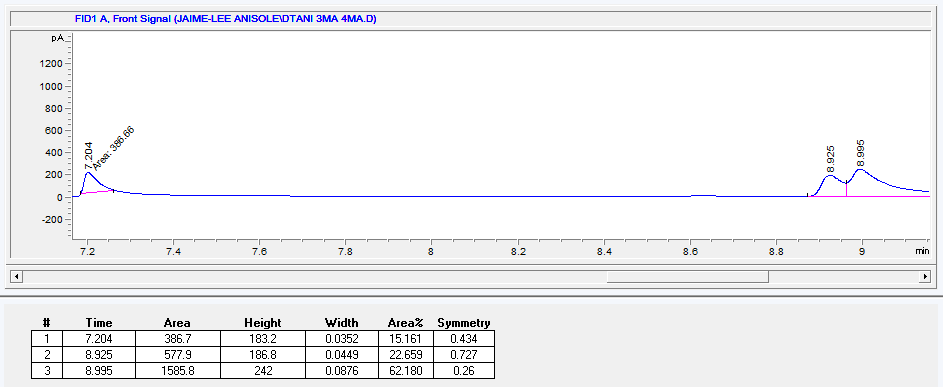
(a) (b)


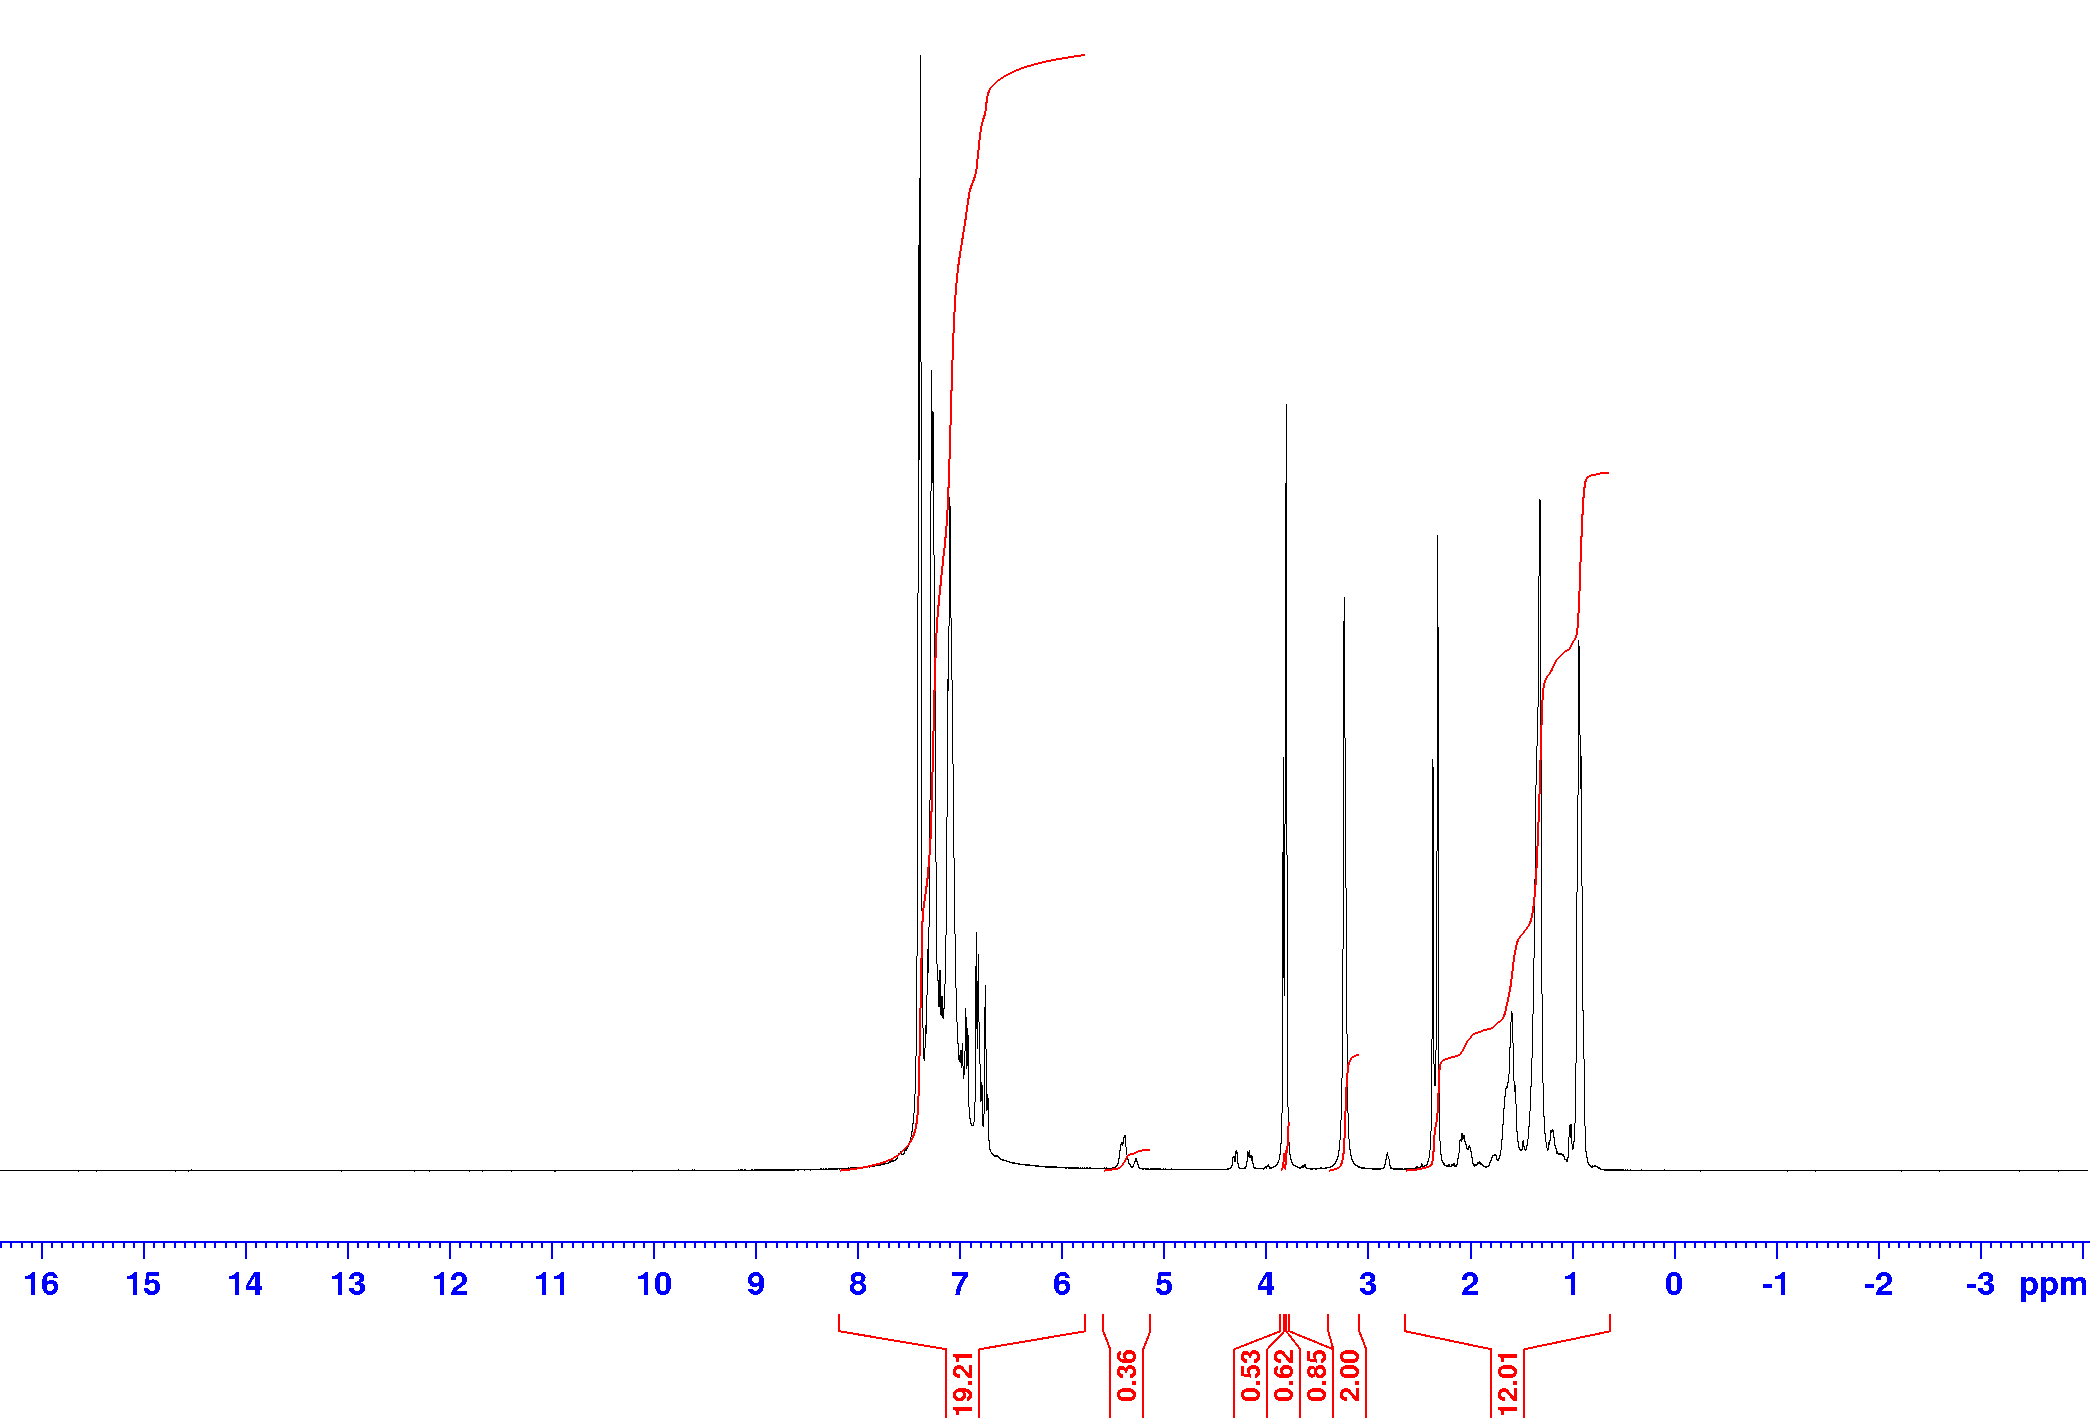
 (c)

**Figure S10** Relevant data for **H** equimolar guest competition of ANI:3MA:4MA (a) GC trace, (b) GC trace of its duplicate, and (c) 1H-NMR spectra.


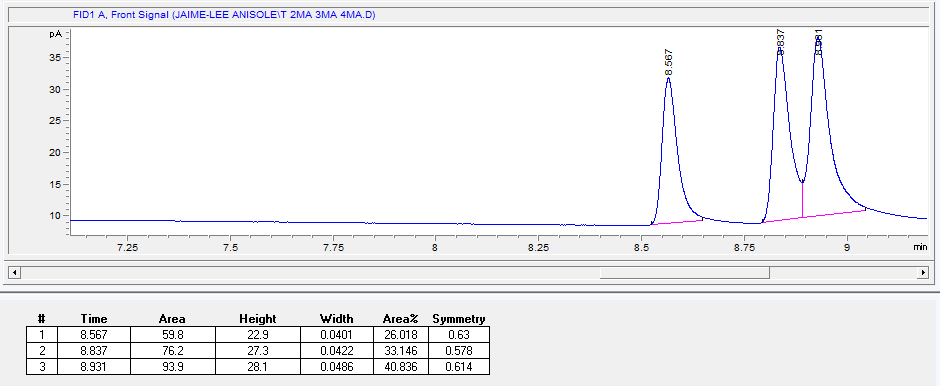

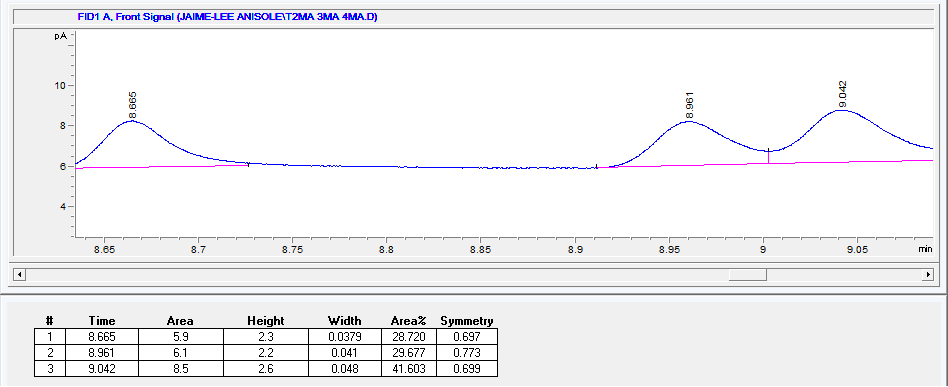
(a) (b)


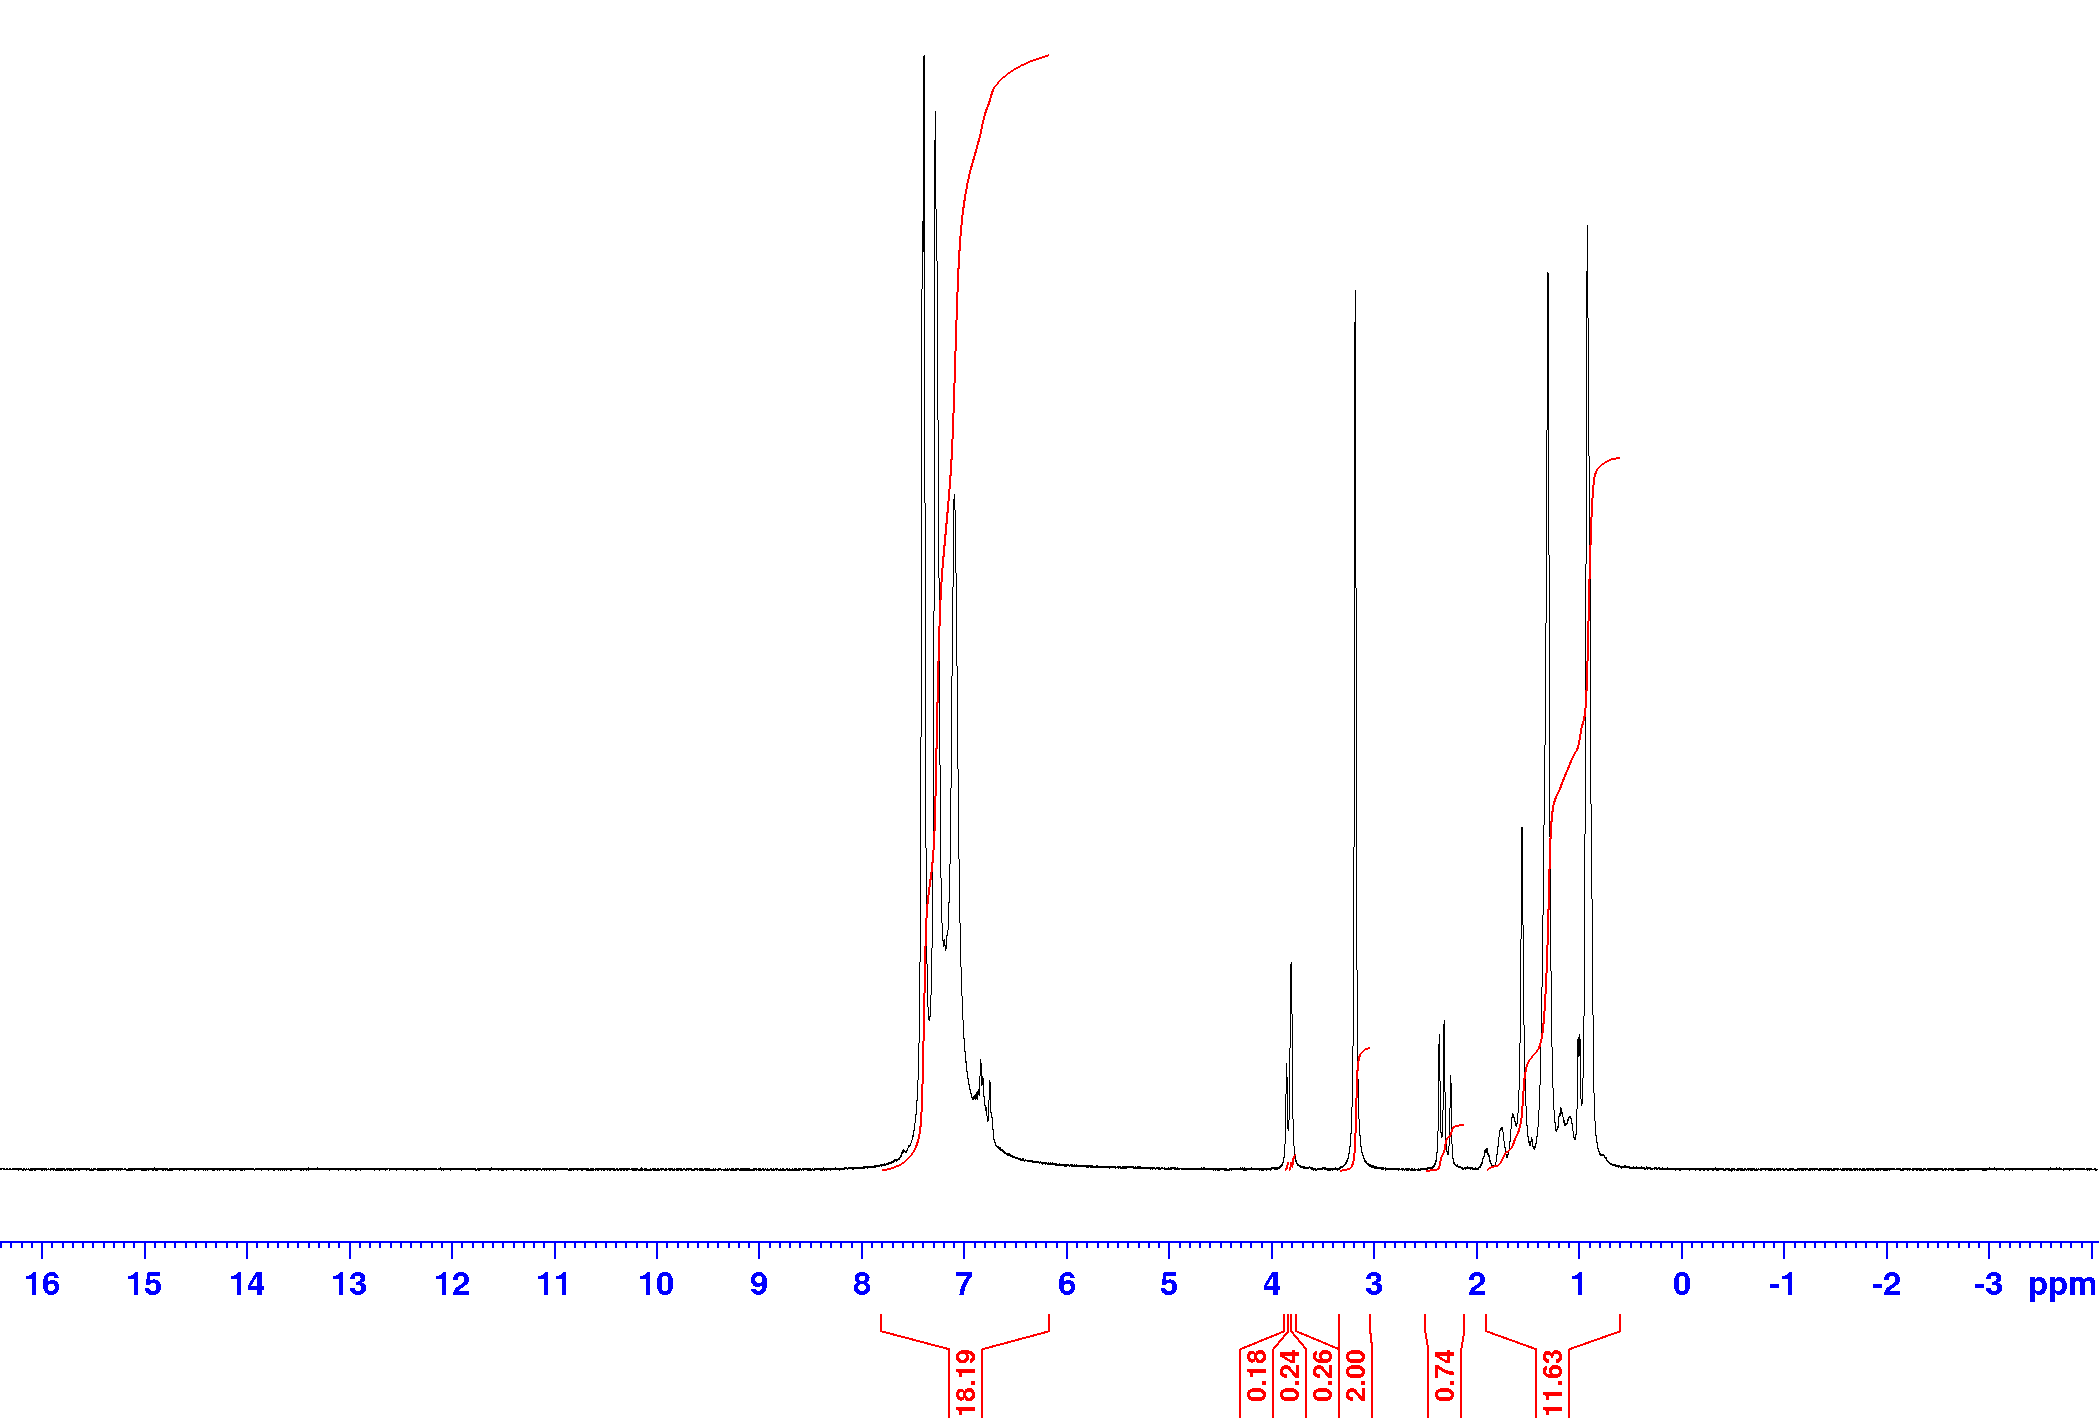
(c)

**Figure S11** Relevant data for **H** equimolar guest competition of 2MA:3MA:4MA (a) GC trace, (b) GC trace of its duplicate, and (c) 1H-NMR spectra.


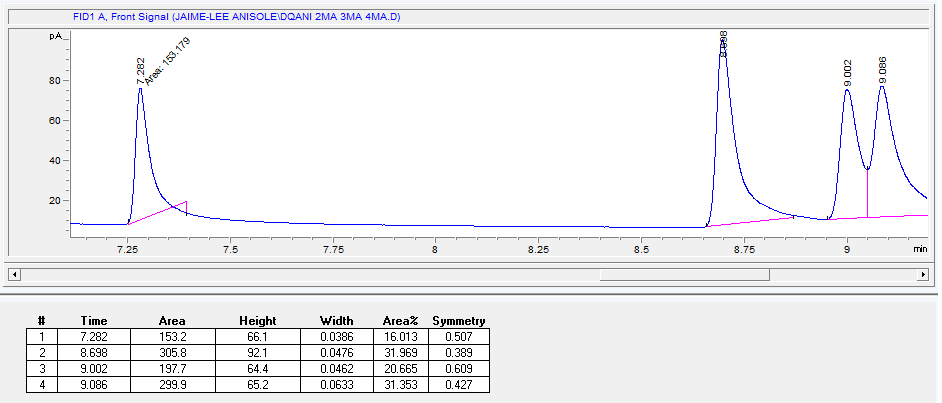

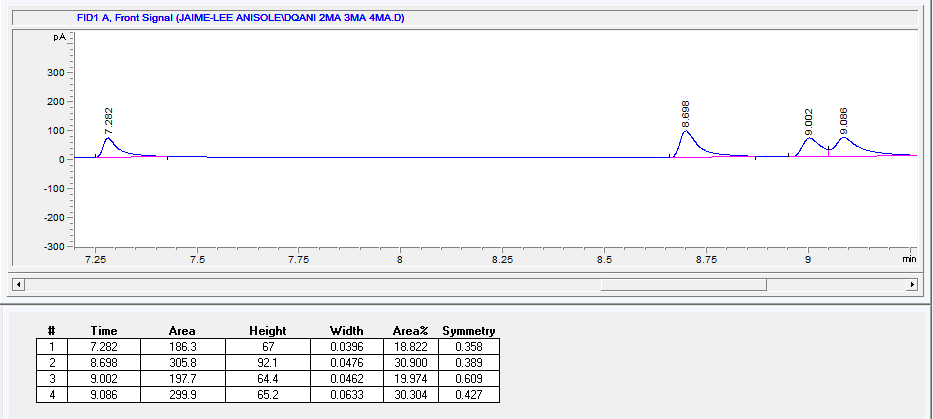
(a) (b)


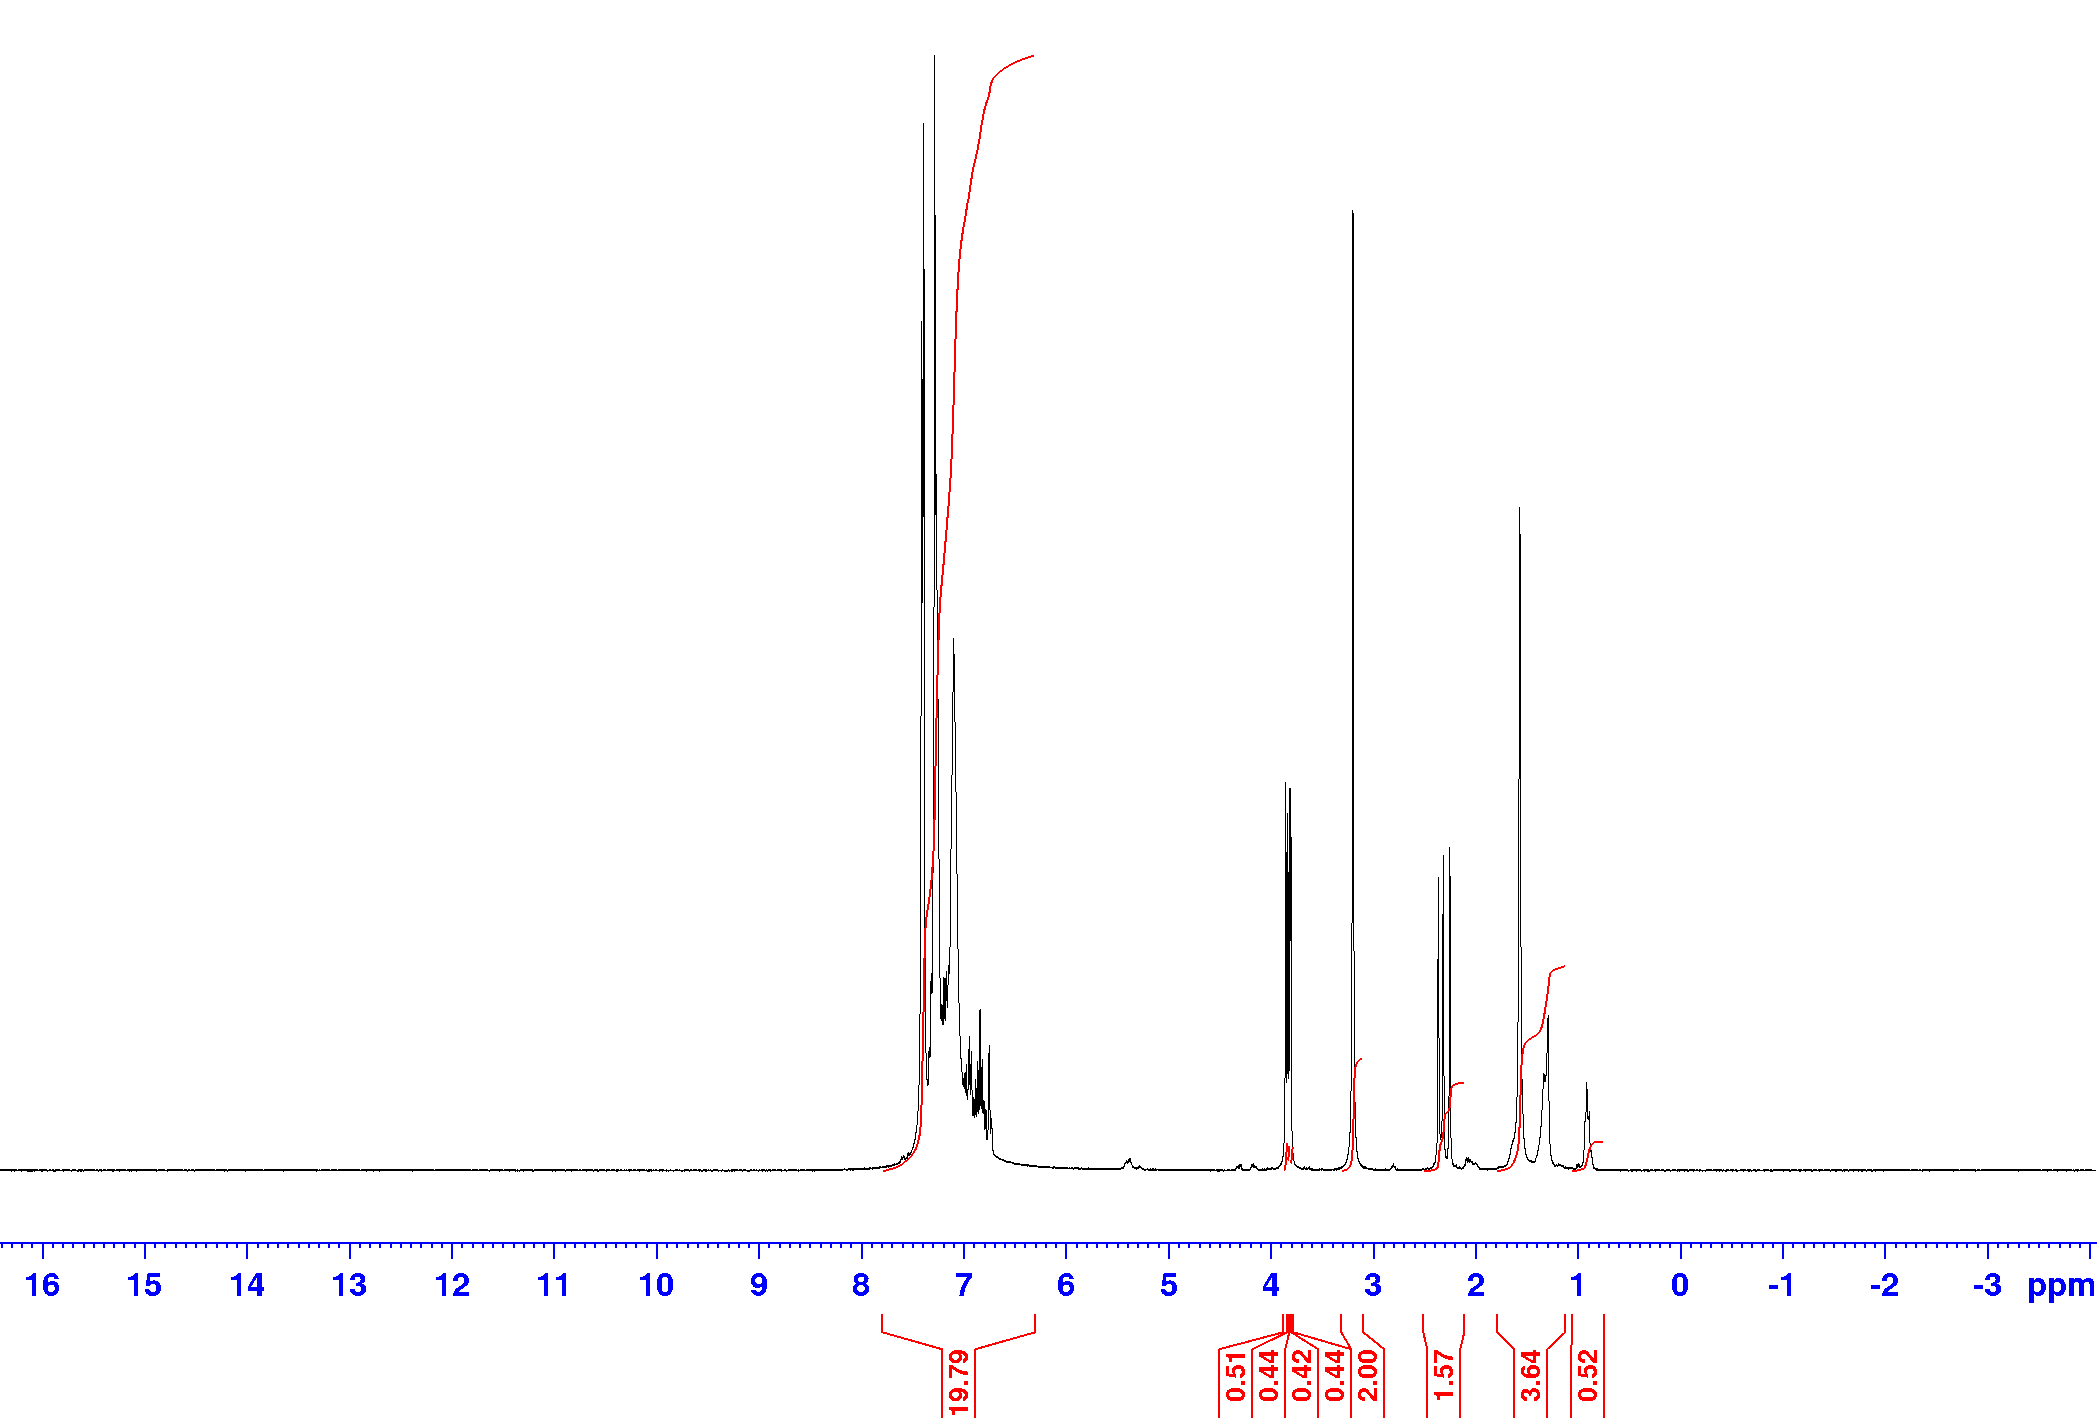
(c)

**Figure S12** Relevant data for **H** equimolar guest competition of ANI:2MA:3MA:4MA (a) GC trace, (b) GC trace of its duplicate, and (c) 1H-NMR spectra.


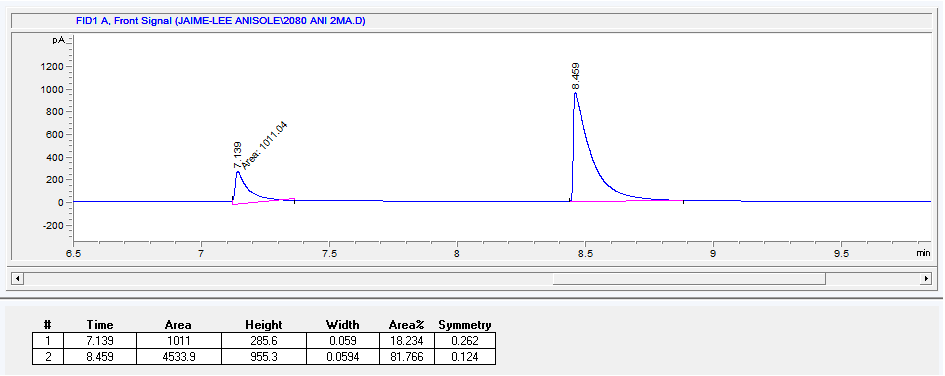

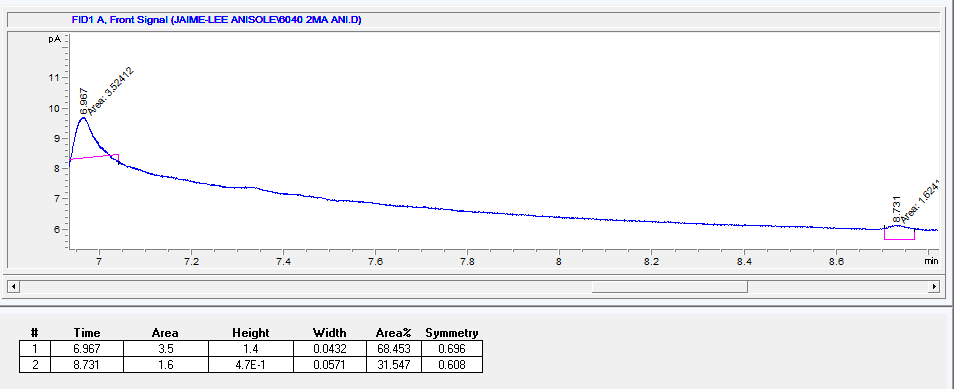
(a) (b)


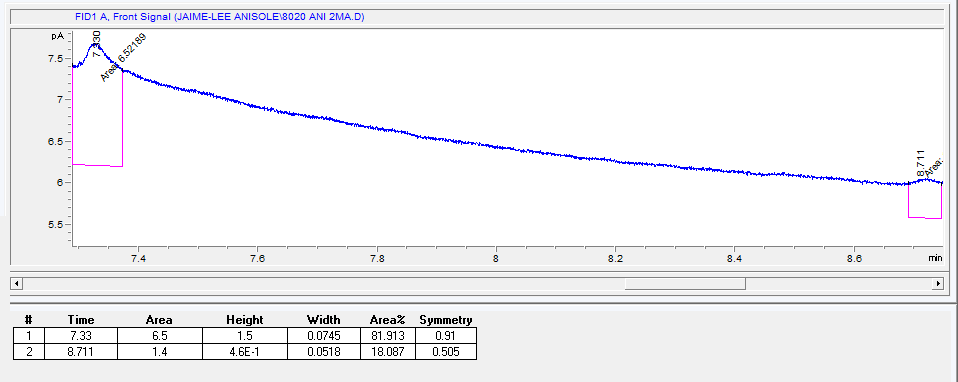

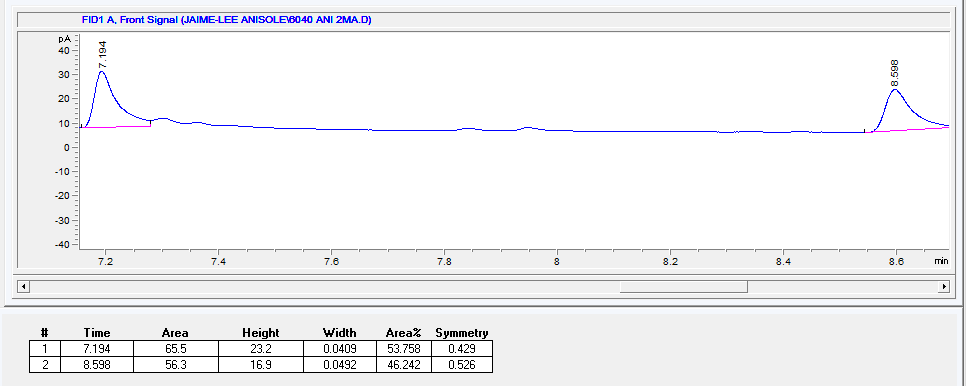
(c) (d)

**Figure S13** GC traces for **H** binary mixtures of ANI and 2MA (a) 20:80, (b) 40:60, (c) 60:40, and (d) 80:20.


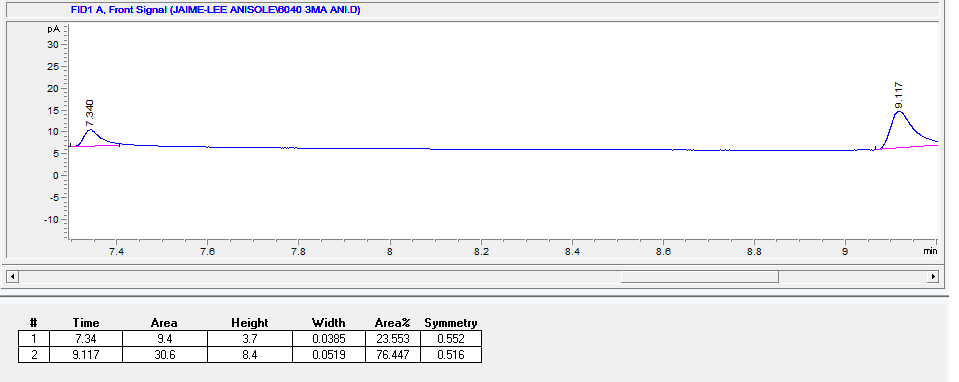

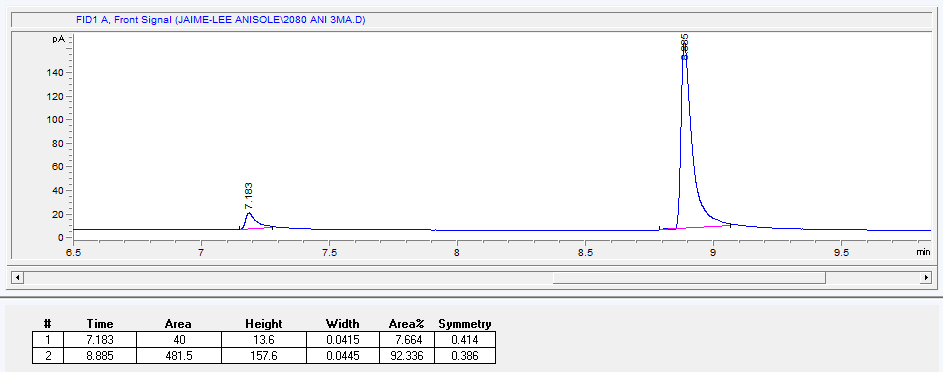
(a) (b)


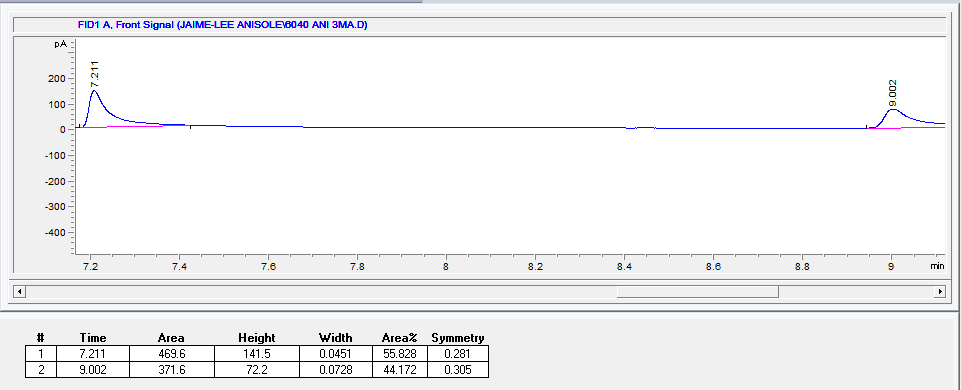

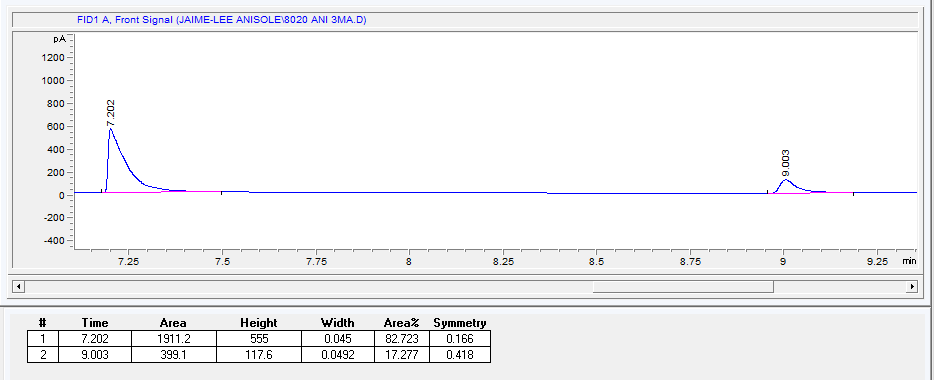
(c) (d)

**Figure S14** GC traces for **H** binary mixtures of ANI and 3MA (a) 20:80, (b) 40:60, (c) 60:40, and (d) 80:20.


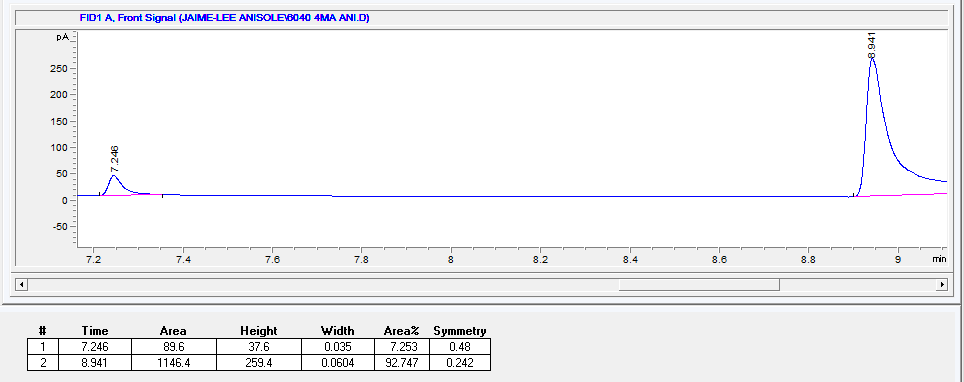

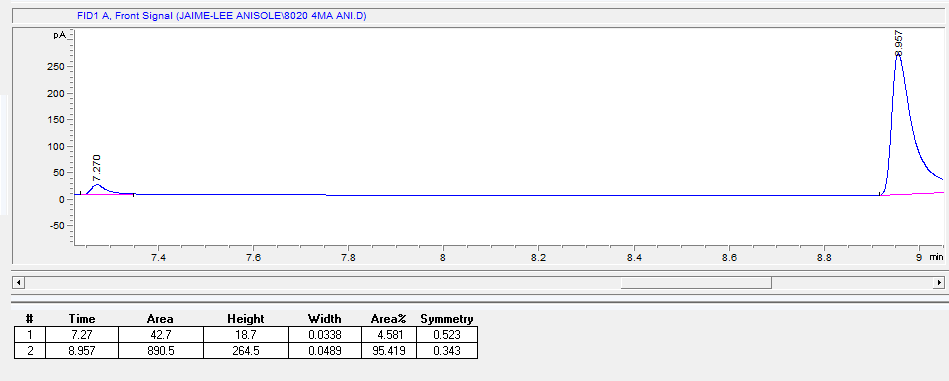
(a) (b)


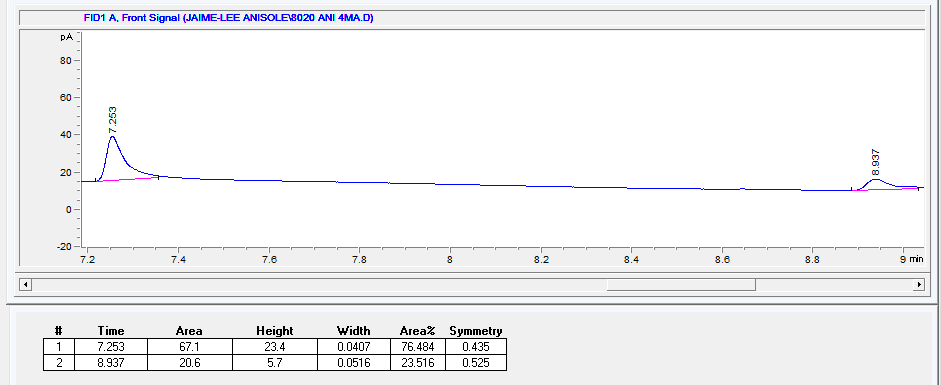

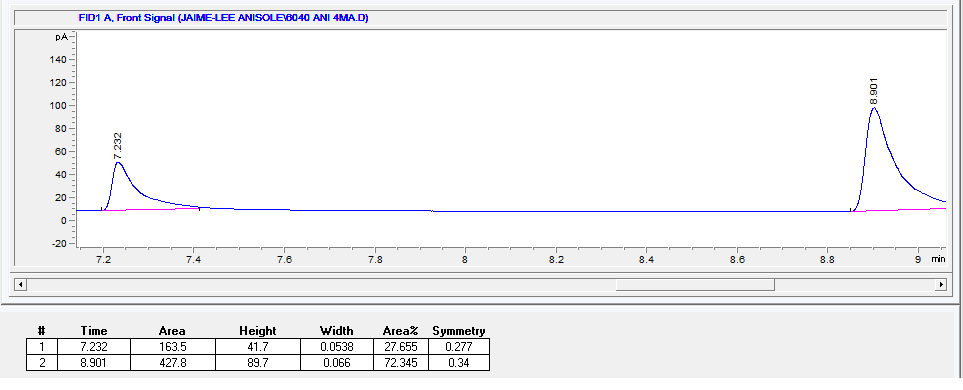
(c) (d)

**Figure S15** GC traces for **H** binary mixtures of ANI and 4MA (a) 20:80, (b) 40:60, (c) 60:40, and (d) 80:20.


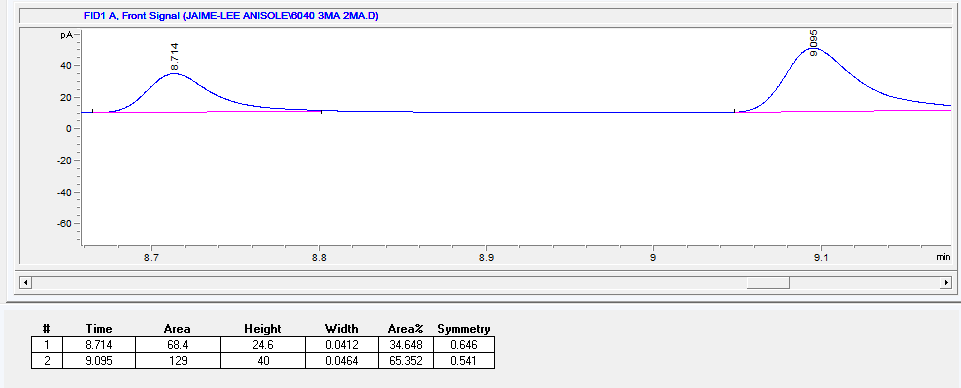

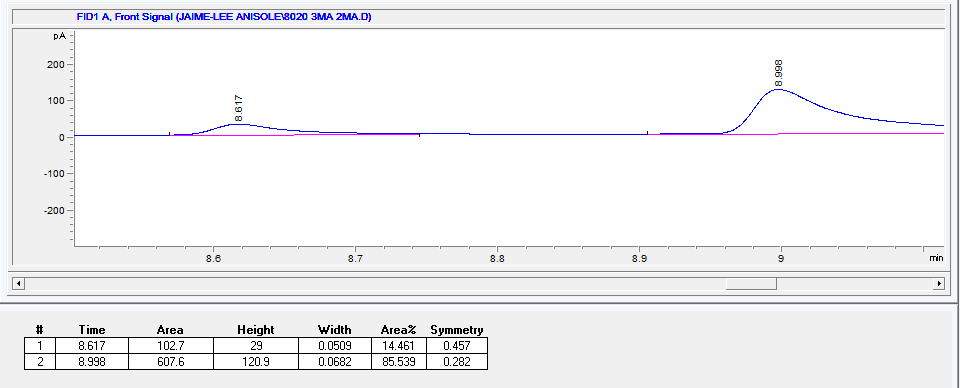
(a) (b)


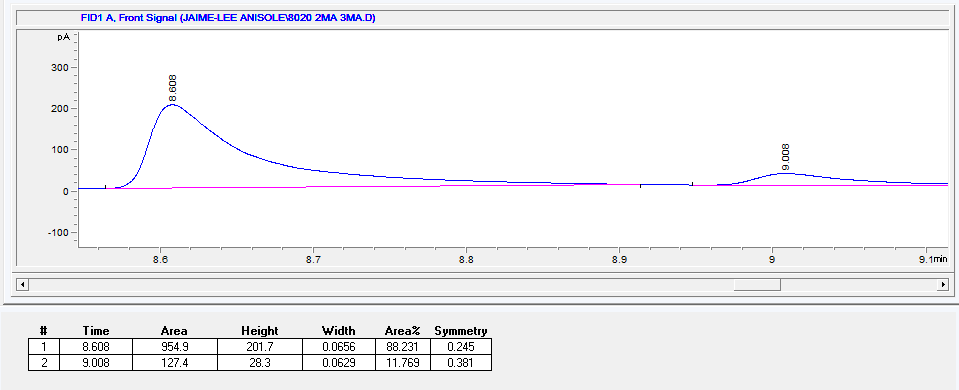

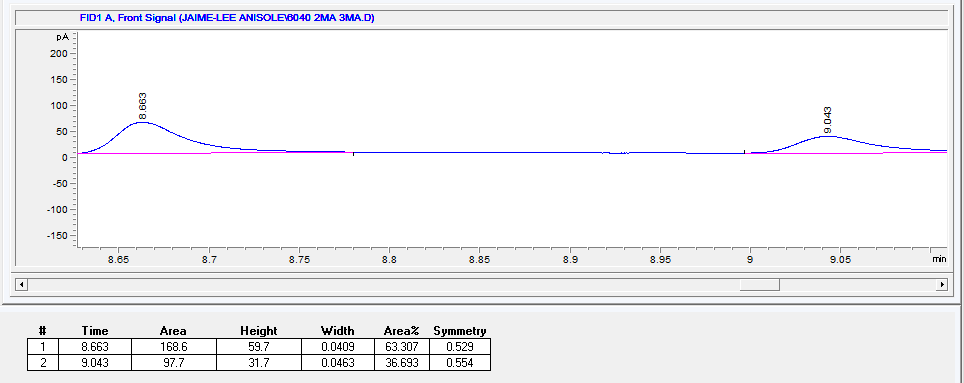


(c) (d)

**Figure S16** GC traces for **H** binary mixtures of 2MA and 3MA (a) 20:80, (b) 40:60, (c) 60:40, and (d) 80:20.


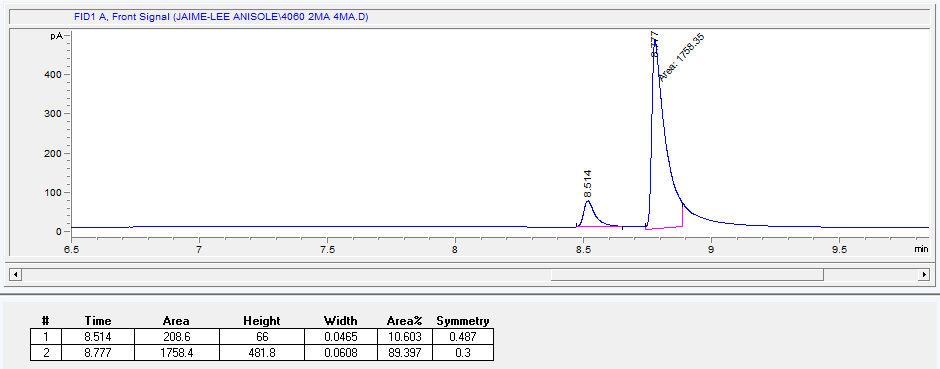

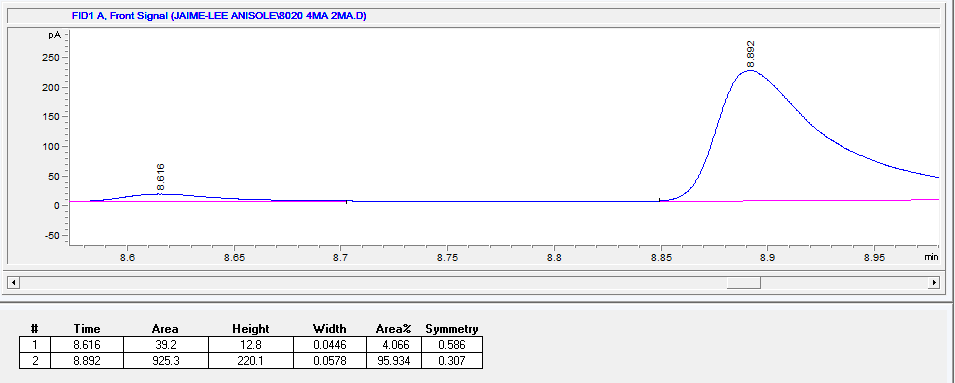
(a) (b)


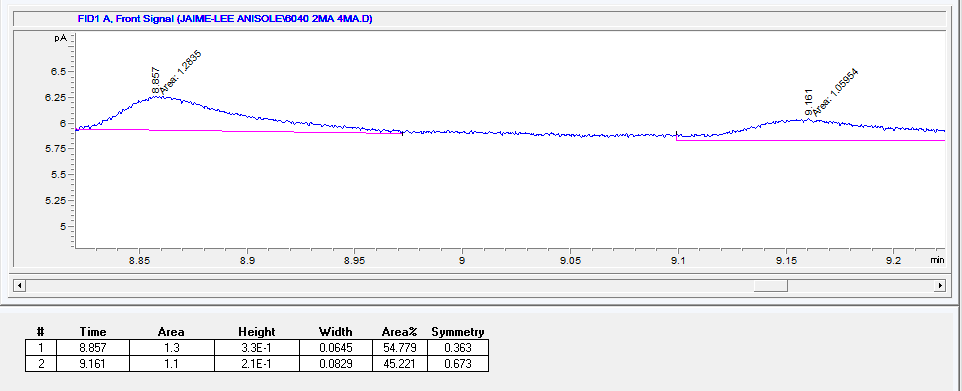


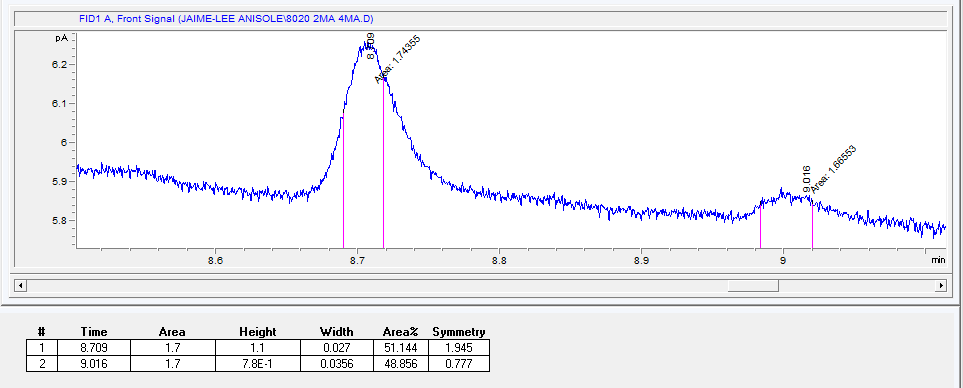
(c) (d)

**Figure S17** GC traces for **H** binary mixtures of 2MA and 4MA (a) 20:80, (b) 40:60, (c) 60:40, and (d) 80:20.


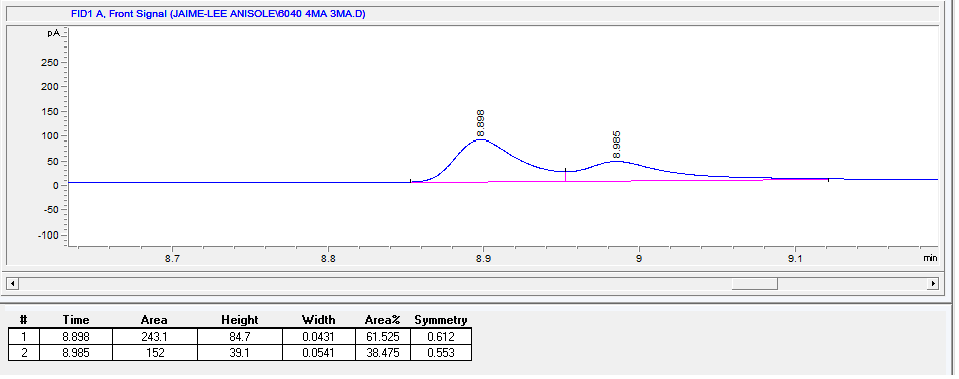

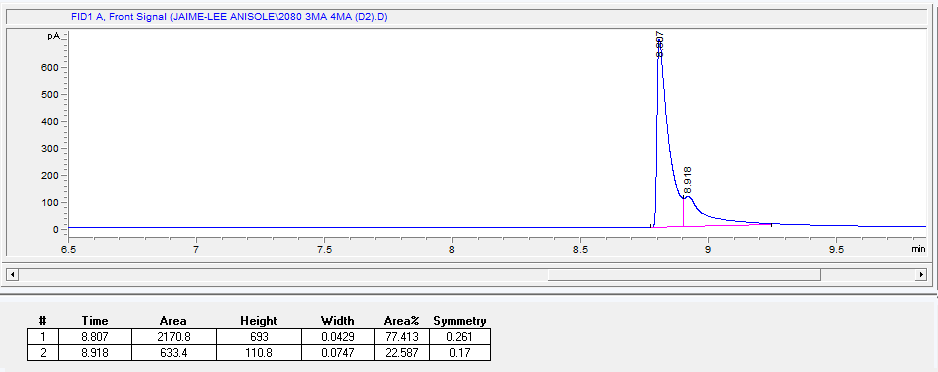
(a) (b)


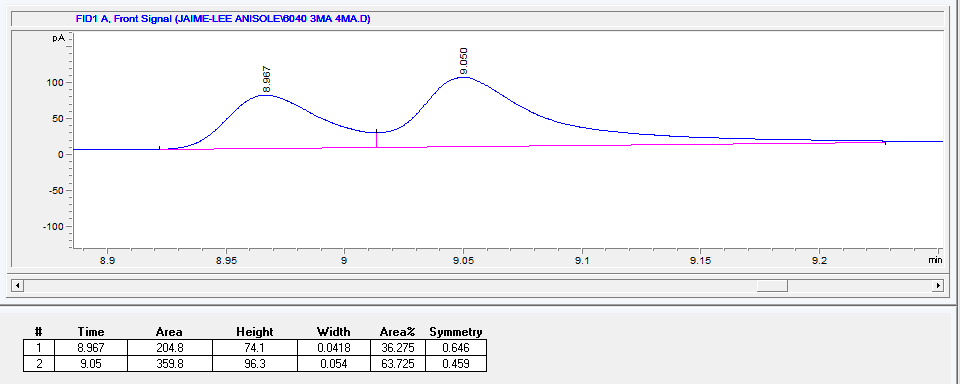


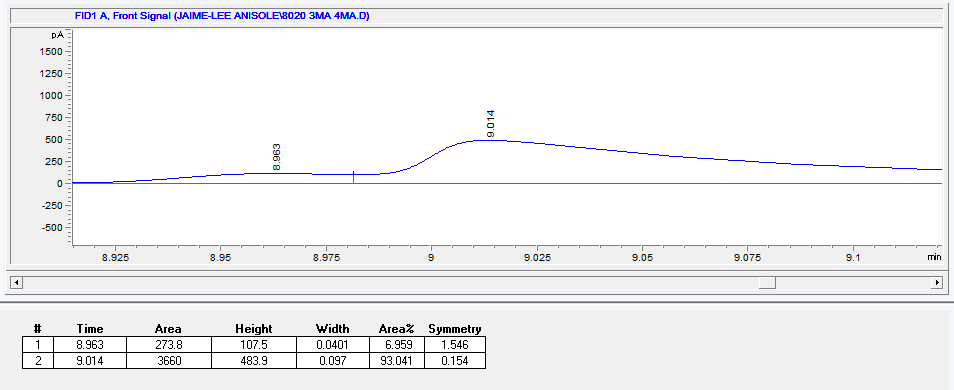
(c) (d)

**Figure S18** GC traces for **H** binary mixtures of 3MA and 4MA (a) 20:80, (b) 40:60, (c) 60:40, and (d) 80:20.

(a) (b)

(c) (d)

(e) (f)

**Figure S19** Selectivity profiles for **H** when crystallized from the (a) 2MA/ANI, (b) 3MA/ANI, (c) 4MA/ANI, (d) 3MA/2MA, (e) 4MA/2MA and (f) 4MA/3MA binary guest solutions. The straight diagonal lines have been inserted to denote a host compound that exhibits no selectivity whatsoever.

**Table S1** Calculated K values for **H** in binary mixtures of ANI and the MAs.

| **Guest (the first listed in each pair) percentage in the original solution** | **Kvalues (in favour of)** | | | | | |
| --- | --- | --- | --- | --- | --- | --- |
| **2MA/ANI** | **3MA/ANI** | **4MA/ANI** | **3MA/2MA** | **4MA/2MA** | **4MA/3MA** |
| **20** | 1.1 (ANI) | 1.2 (ANI) | 1.2 (4MA) | 1.9 (2MA) | 2.6 (2MA) | 3.3 (3MA) |
| **40** | 1.3 (2MA) | 1.2 (3MA) | 3.9 (4MA) | 1.2 (2MA) | 1.2 (4MA) | 1.2 (3MA) |
| **50** | 1.5 (2MA) | 1.2 (3MA) | 2.2 (4MA) | 1.4 (3MA) | 2.4 (4MA) | 1.3 (4MA) |
| **60** | 1.4 (2MA) | 2.2 (3MA) | 8.5 (4MA) | 1.3 (3MA) | 5.6 (4MA) | 1.1 (4MA) |
| **80** | 1.1 (2MA) | 3.0 (3MA) | 5.2 (4MA) | 1.5 (3MA) | 5.9 (4MA) | 0.9 (4MA) |

(a)

(b)

(c)

(d)

(e)

**Figure S20** ORTEP diagrams for the complexes formed (a) **H**·0.778(ANI), (b) **H**·0.778(2MA), (c) **H**·0.667(3MA), (d) **H**·0.667(4MA1) and (e) **H**·0.75(4MA2).

**Table S2** Crystallographic data before and after the SQUEEZE routine for the complexes of **H** with ANI, 2MA, 3MA and 4MA.

| **Guest** | **ANI** | **ANI SQ** | **2MA** | **2MA SQ** | **3MA1** | **3MA2** | **3MA SQ** | **4MA1** | **4MA1 SQ** | **4MA2** | **4MA2 SQ** |
| --- | --- | --- | --- | --- | --- | --- | --- | --- | --- | --- | --- |
| **Comment** |  |  |  |  | **(Initially)** | **(Refined)** |  |  |  |  |  |
| **Space group** | *R-3* | *R-3* | *R-3* | *R-3* | *P*-1 | *P*-1 | *P*-1 | *P*-1 | *P*-1 | *P*-1 | *P*-1 |
| ***a*** | 31.8624 | 31.8624 | 32.0983 | 32.0983 | 18.6966 | 12.1377 | 12.138 | 12.215 | 12.215 | 10.227 | 10.2266 |
| ***b*** | 31.8624 | 31.8624 | 32.0983 | 32.0983 | 18.9785 | 18.4488 | 18.449 | 18.389 | 18.3885 | 12.692 | 12.6915 |
| ***c*** | 12.1461 | 12.1461 | 12.1248 | 12.1248 | 24.1663 | 18.7002 | 18.7 | 18.552 | 18.5519 | 19.322 | 19.3221 |
| ***α*** | 90 | 90 | 90 | 90 | 101.404 | 115.101 | 115.1 | 115.85 | 115.854 | 84.939 | 84.9386 |
| ***β*** | 90 | 90 | 90 | 90 | 103.102 | 101.188 | 101.19 | 101.14 | 101.141 | 83.883 | 83.8825 |
| ***γ*** | 120 | 120 | 120 | 120 | 116.657 | 102.425 | 102.43 | 100.54 | 100.542 | 77.579 | 77.5793 |
| **Platon ratio H** | 1 | 1 | 2 | 1 | 12 | 1 | 1 | 3 | 1 | 4 | 1 |
| **Platon ratio G** | 0.727 | 0 | 0.667 | 0 | 7 | 0.522 | 0 | 2 | 0 | 3 | 0 |
| **ratio H:G** | 1.38 | #N/A | 3 | #N/A | 1.71 | 1.92 | #N/A | 1.5 | #N/A | 1.33 | #N/A |
| **z** | 18 | 18 | 9 | 18 | 1 | 6 | 6 | 2 | 6 | 1 | 4 |
| **e- (H)** | 190 | 190 | 190 | 190 | 190 | 190 | 190 | 190 | 190 | 190 | 190 |
| **e- (G)** | 58 | 58 | 66 | 66 | 66 | 66 | 66 | 66 | 66 | 66 | 66 |
| **F(OOO)** | 4179 | 3420 | 3816 | 3420 | 2742 | 1347 | 1140 | 1404 | 1140 | 958 | 760 |
| **Calc tot e-** | 4178.99 | 3420 | 3816.2 | 3420 | 2742 | 1346.712 | 1140 | 1404 | 1140 | 958 | 760 |
| **Rint** | 0.046 | 0.046 | 0.151 | 0.151 | 0.065 | 0.053 | 0.053 | 0.094 | 0.094 | 0.063 | 0.063 |
| **R** | 0.0997 | 0.0619 | 0.1447 | 0.0768 | 0.0903 | 0.0879 | 0.0708 | 0.1501 | 0.1339 | 0.0485 | 0.0547 |
| **wR2** | 0.305 | 0.149 | 0.3999 | 0.1731 | 0.238 | 0.23 | 0.1856 | 0.3659 | 0.3313 | 0.1075 | 0.1364 |
| **S** | 1.11 | 1.08 | 1.67 | 1.05 | 1.09 | 1.13 | 1.13 | 1.24 | 1.17 | 1.13 | 1.1 |
| **e- void/cell** | #N/A | 811 | #N/A | 892 | #N/A | #N/A | 250 | #N/A | 291 | #N/A | 201 |
| **Num G** | #N/A | 13.983 | #N/A | 13.515 | #N/A | #N/A | 3.788 | #N/A | 4.409 | #N/A | 3.045 |
| **round (Num G)** | #N/A | 14 | #N/A | 14 | #N/A | #N/A | 4 | #N/A | 4 | #N/A | 3 |
| **ratio H:G** | #N/A | 1.29 | #N/A | 1.29 | #N/A | #N/A | 1.5 | #N/A | 1.5 | #N/A | 1.33 |


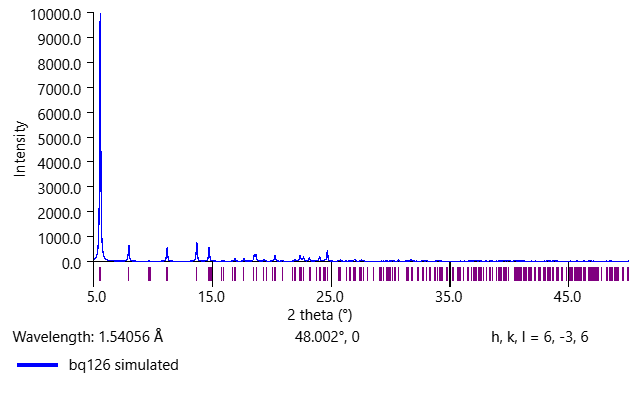
(a)


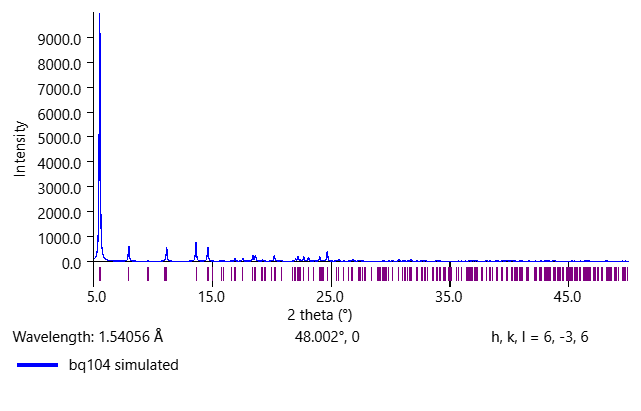
(b)

**Figure S21** Calculated powder X-ray diffraction (PXRD) patterns for the complexes of **H** with (a) ANI and (b) 2MA, illustrating the close similarity between the two.

(a)
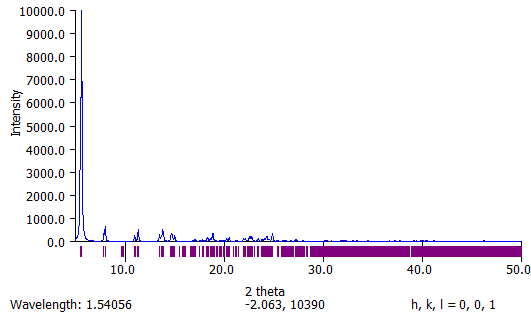


(b)
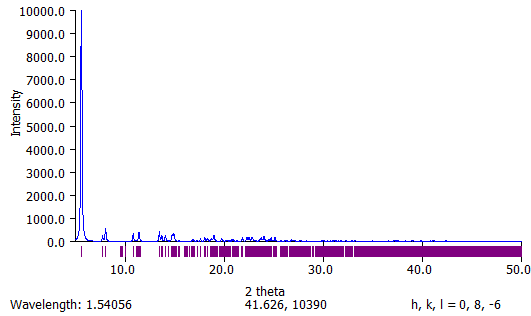


**Figure S22** Calculated powder X-ray diffraction (PXRD) patterns for the complexes of **H** with (a) 3MA and (b) 4MA1, illustrating their isostructurality.
